# Supplementary material for: Single-cell analyses of X Chromosome inactivation dynamics and pluripotency during differentiation
Source: Genome Res. 2016 Oct;26(10):1342–54. doi: 10.1101/gr.201954.115 (PMC5052059; doi:10.1101/gr.201954.115)
Supplement: Supplemental Material [file supp_gr.201954.115_Supplemental_Table_S1.xlsx]

## Sheet: table
Supplemental Table S1. Genes with enriched expression in ES2i condition
Chromosome	Ensembl gene ID	Symbol
11	ENSMUSG00000000120	Ngfr
11	ENSMUSG00000000142	Axin2
7	ENSMUSG00000000154	Slc22a18
7	ENSMUSG00000000244	Tspan32
11	ENSMUSG00000000275	Trim25
2	ENSMUSG00000000308	Ckmt1
11	ENSMUSG00000000320	Alox12
X	ENSMUSG00000000402	Egfl6
6	ENSMUSG00000000416	Cttnbp2
7	ENSMUSG00000000486	Sept1
1	ENSMUSG00000000544	Gpa33
8	ENSMUSG00000000739	Sult5a1
6	ENSMUSG00000000938	Hoxa10
X	ENSMUSG00000001128	Cfp
12	ENSMUSG00000001270	Ckb
15	ENSMUSG00000001655	Hoxc13
6	ENSMUSG00000001930	Vwf
4	ENSMUSG00000001985	Grik3
9	ENSMUSG00000002033	Cd3g
2	ENSMUSG00000002104	Rapsn
16	ENSMUSG00000002847	Pla1a
8	ENSMUSG00000002910	Arrdc2
7	ENSMUSG00000002983	Relb
4	ENSMUSG00000003032	Klf4
1	ENSMUSG00000003051	Elf3
7	ENSMUSG00000003271	Sult2b1
17	ENSMUSG00000003279	Dlgap1
7	ENSMUSG00000003420	Fcgrt
2	ENSMUSG00000003604	Aven
8	ENSMUSG00000003657	Calb2
8	ENSMUSG00000003849	Nqo1
3	ENSMUSG00000004038	Gstm3
11	ENSMUSG00000004043	Stat5a
10	ENSMUSG00000004359	Spic
6	ENSMUSG00000004988	Fxyd4
5	ENSMUSG00000005672	Kit
6	ENSMUSG00000005892	Trh
5	ENSMUSG00000005907	Pex1
11	ENSMUSG00000006056	Calcoco2
1	ENSMUSG00000006301	Tmbim1
7	ENSMUSG00000006310	Zbtb32
7	ENSMUSG00000006313	Upk1a
10	ENSMUSG00000006342	Susd2
10	ENSMUSG00000006345	Ggt1
5	ENSMUSG00000006641	Slc5a6
11	ENSMUSG00000006930	Hap1
5	ENSMUSG00000007457	2310003L06Rik
5	ENSMUSG00000007907	Cabs1
5	ENSMUSG00000008090	Fgfrl1
10	ENSMUSG00000008398	Elk3
4	ENSMUSG00000008575	Nfib
6	ENSMUSG00000009145	Dqx1
9	ENSMUSG00000010051	Hyal1
8	ENSMUSG00000010154	Spire2
11	ENSMUSG00000010358	Ifi35
11	ENSMUSG00000010362	Rdm1
7	ENSMUSG00000011267	Zfp296
4	ENSMUSG00000012126	Ubxn11
6	ENSMUSG00000012396	Nanog
1	ENSMUSG00000013275	Slc41a1
9	ENSMUSG00000013584	Aldh1a2
17	ENSMUSG00000013766	Ly6g6e
13	ENSMUSG00000014164	Klhl3
6	ENSMUSG00000015053	Gata2
7	ENSMUSG00000015134	Aldh1a3
10	ENSMUSG00000015305	Sash1
10	ENSMUSG00000015312	Gadd45b
9	ENSMUSG00000015354	Pcolce2
8	ENSMUSG00000015568	Lpl
11	ENSMUSG00000017204	Gsdma
11	ENSMUSG00000017718	Afmid
2	ENSMUSG00000017929	B4galt5
11	ENSMUSG00000018411	Mapt
11	ENSMUSG00000018427	Ypel2
11	ENSMUSG00000018470	Kcnab3
5	ENSMUSG00000018604	Tbx3
11	ENSMUSG00000018648	Dusp14
11	ENSMUSG00000018727	Cpsf4l
8	ENSMUSG00000018796	Acsl1
11	ENSMUSG00000018899	Irf1
15	ENSMUSG00000019080	Mfsd3
7	ENSMUSG00000019429	Ffar3
5	ENSMUSG00000019518	Ap4m1
X	ENSMUSG00000019558	Slc6a8
12	ENSMUSG00000019718	L3hypdh
10	ENSMUSG00000019767	Ccdc170
10	ENSMUSG00000019817	Plagl1
10	ENSMUSG00000019842	Traf3ip2
10	ENSMUSG00000019848	Popdc3
11	ENSMUSG00000020173	Cobl
11	ENSMUSG00000020182	Ddc
11	ENSMUSG00000020388	Pdlim4
12	ENSMUSG00000020562	Efcab10
12	ENSMUSG00000020566	Atp6v1c2
11	ENSMUSG00000020623	Map2k6
12	ENSMUSG00000020634	Ubxn2a
11	ENSMUSG00000020707	Rnf135
11	ENSMUSG00000020709	Adap2
11	ENSMUSG00000020728	Cep112
11	ENSMUSG00000020773	Trim47
11	ENSMUSG00000020788	Atp2a3
11	ENSMUSG00000020799	Tekt1
11	ENSMUSG00000020865	Abcc3
11	ENSMUSG00000020889	Nr1d1
11	ENSMUSG00000020902	Ntn1
11	ENSMUSG00000020904	Cfap52
12	ENSMUSG00000021200	Asb2
12	ENSMUSG00000021245	Mlh3
12	ENSMUSG00000021255	Esrrb
12	ENSMUSG00000021271	Zfp839
13	ENSMUSG00000021322	Aoah
13	ENSMUSG00000021359	Tfap2a
13	ENSMUSG00000021360	Gcnt2
13	ENSMUSG00000021403	Serpinb9b
13	ENSMUSG00000021456	Fbp2
13	ENSMUSG00000021461	Fancc
13	ENSMUSG00000021508	Cxcl14
13	ENSMUSG00000021509	Slc25a48
13	ENSMUSG00000021615	Xrcc4
13	ENSMUSG00000021696	Elovl7
14	ENSMUSG00000021792	Fam213a
14	ENSMUSG00000021835	Bmp4
14	ENSMUSG00000021846	Peli2
14	ENSMUSG00000021947	Cryl1
14	ENSMUSG00000021953	Tdh
14	ENSMUSG00000021998	Lcp1
14	ENSMUSG00000022018	Rgcc
14	ENSMUSG00000022032	Scara5
14	ENSMUSG00000022040	Ephx2
14	ENSMUSG00000022099	Dmtn
14	ENSMUSG00000022180	Slc7a8
15	ENSMUSG00000022206	Npr3
14	ENSMUSG00000022218	Tgm1
14	ENSMUSG00000022221	Ripk3
15	ENSMUSG00000022261	Sdc2
15	ENSMUSG00000022304	Dpys
15	ENSMUSG00000022358	Fbxo32
15	ENSMUSG00000022364	Tbc1d31
15	ENSMUSG00000022488	Nckap1l
16	ENSMUSG00000022505	Emp2
16	ENSMUSG00000022548	Apod
15	ENSMUSG00000022550	Adck5
15	ENSMUSG00000022575	Gsdmd
15	ENSMUSG00000022595	Lypd2
16	ENSMUSG00000022652	Morc1
16	ENSMUSG00000022805	Maats1
16	ENSMUSG00000022818	Cyp2ab1
16	ENSMUSG00000022868	Ahsg
16	ENSMUSG00000022871	Fetub
16	ENSMUSG00000022900	Ildr1
16	ENSMUSG00000022906	Parp9
16	ENSMUSG00000022946	Dopey2
16	ENSMUSG00000022947	Cbr3
15	ENSMUSG00000023022	Lima1
15	ENSMUSG00000023032	Slc4a8
15	ENSMUSG00000023047	Amhr2
2	ENSMUSG00000023094	Msrb2
9	ENSMUSG00000023259	Slc26a6
6	ENSMUSG00000023274	Cd4
2	ENSMUSG00000023393	Slc17a9
7	ENSMUSG00000023467	Tulp2
17	ENSMUSG00000023931	Efhb
17	ENSMUSG00000023935	Spats1
17	ENSMUSG00000023987	Pgc
17	ENSMUSG00000023990	Tfeb
17	ENSMUSG00000023995	Tspo2
17	ENSMUSG00000024008	Cpne5
17	ENSMUSG00000024030	Abcg1
17	ENSMUSG00000024039	Cbs
17	ENSMUSG00000024055	Cyp4f13
17	ENSMUSG00000024206	Rfx2
18	ENSMUSG00000024268	Celf4
18	ENSMUSG00000024313	Mep1b
18	ENSMUSG00000024349	Tmem173
17	ENSMUSG00000024391	Apom
18	ENSMUSG00000024421	Lama3
18	ENSMUSG00000024424	Ttc39c
17	ENSMUSG00000024459	H2-M5
18	ENSMUSG00000024565	Sall3
18	ENSMUSG00000024619	Cdx1
19	ENSMUSG00000024766	Lipo1
19	ENSMUSG00000024900	Cpt1a
19	ENSMUSG00000024963	Dnajc4
19	ENSMUSG00000024972	Lgals12
19	ENSMUSG00000024998	Plce1
19	ENSMUSG00000025036	Sfxn2
X	ENSMUSG00000025056	Nr0b1
19	ENSMUSG00000025202	Scd3
19	ENSMUSG00000025221	Kcnip2
8	ENSMUSG00000025317	Car5a
4	ENSMUSG00000025330	Padi4
X	ENSMUSG00000025333	Gpr143
10	ENSMUSG00000025359	Pmel
10	ENSMUSG00000025400	Tac2
10	ENSMUSG00000025401	Myo1a
7	ENSMUSG00000025467	Prap1
X	ENSMUSG00000025531	Chm
14	ENSMUSG00000025557	Slc15a1
11	ENSMUSG00000025572	Tmc6
7	ENSMUSG00000025584	Pde8a
7	ENSMUSG00000025726	Slc28a1
2	ENSMUSG00000025815	Dhtkd1
2	ENSMUSG00000025838	Pramel6
2	ENSMUSG00000025839	Pramel7
5	ENSMUSG00000025856	Pdgfa
1	ENSMUSG00000025911	Adhfe1
1	ENSMUSG00000025932	Eya1
1	ENSMUSG00000025934	Gsta3
1	ENSMUSG00000025969	Nrp2
1	ENSMUSG00000026177	Slc11a1
1	ENSMUSG00000026235	Epha4
1	ENSMUSG00000026301	Iqca
1	ENSMUSG00000026339	Ccdc93
1	ENSMUSG00000026365	Cfh
1	ENSMUSG00000026380	Tfcp2l1
1	ENSMUSG00000026398	Nr5a2
1	ENSMUSG00000026418	Tnni1
1	ENSMUSG00000026433	Rab29
1	ENSMUSG00000026435	Slc45a3
1	ENSMUSG00000026463	Atp2b4
1	ENSMUSG00000026479	Lamc2
1	ENSMUSG00000026480	Ncf2
1	ENSMUSG00000026483	Fam129a
1	ENSMUSG00000026546	Cfap45
1	ENSMUSG00000026614	Slc30a10
1	ENSMUSG00000026656	Fcgr2b
2	ENSMUSG00000026664	Phyh
2	ENSMUSG00000026672	Optn
2	ENSMUSG00000026922	Agpat2
2	ENSMUSG00000026956	Uap1l1
2	ENSMUSG00000026980	Ly75
2	ENSMUSG00000027078	Ube2l6
2	ENSMUSG00000027233	Patl2
2	ENSMUSG00000027284	Cdan1
2	ENSMUSG00000027296	Itpka
2	ENSMUSG00000027317	Ppp1r14d
2	ENSMUSG00000027333	Smox
2	ENSMUSG00000027347	Rasgrp1
2	ENSMUSG00000027375	Mal
2	ENSMUSG00000027452	Acss1
2	ENSMUSG00000027456	Sdcbp2
2	ENSMUSG00000027463	Slc52a3
2	ENSMUSG00000027514	Zbp1
3	ENSMUSG00000027536	Chmp4c
2	ENSMUSG00000027610	Gss
3	ENSMUSG00000027668	Mfn1
3	ENSMUSG00000027702	Lrrc34
3	ENSMUSG00000027703	Lrriq4
3	ENSMUSG00000027939	Nup210l
3	ENSMUSG00000027947	Il6ra
3	ENSMUSG00000028019	Pdgfc
3	ENSMUSG00000028042	Zbtb7b
3	ENSMUSG00000028159	Dapp1
3	ENSMUSG00000028164	Manba
4	ENSMUSG00000028251	Tstd3
4	ENSMUSG00000028294	1700003M02Rik
1	ENSMUSG00000028354	Fmn2
4	ENSMUSG00000028378	Ptgr1
4	ENSMUSG00000028412	Slc44a1
4	ENSMUSG00000028434	Epb4.1l4b
4	ENSMUSG00000028435	Aqp3
4	ENSMUSG00000028488	Sh3gl2
4	ENSMUSG00000028517	Ppap2b
4	ENSMUSG00000028527	Ak4
4	ENSMUSG00000028538	St3gal3
4	ENSMUSG00000028540	Dph2
4	ENSMUSG00000028581	Laptm5
4	ENSMUSG00000028591	Pramef12
4	ENSMUSG00000028599	Tnfrsf1b
4	ENSMUSG00000028602	Tnfrsf8
4	ENSMUSG00000028637	Ccdc30
2	ENSMUSG00000028640	Tfap2c
4	ENSMUSG00000028699	Tspan1
4	ENSMUSG00000028709	Mob3c
4	ENSMUSG00000028801	Stpg1
4	ENSMUSG00000028803	Nipal3
4	ENSMUSG00000028836	Slc30a2
4	ENSMUSG00000028859	Csf3r
5	ENSMUSG00000028970	Abcb1b
5	ENSMUSG00000029082	Bst1
5	ENSMUSG00000029084	Cd38
5	ENSMUSG00000029095	Ablim2
5	ENSMUSG00000029097	Trmt44
5	ENSMUSG00000029153	Ociad2
5	ENSMUSG00000029171	Pgm1
5	ENSMUSG00000029195	Klb
5	ENSMUSG00000029235	Pdcl2
5	ENSMUSG00000029313	Aff1
5	ENSMUSG00000029361	Nos1
5	ENSMUSG00000029471	Camkk2
5	ENSMUSG00000029524	Sirt4
5	ENSMUSG00000029646	Cdx2
5	ENSMUSG00000029651	Mtus2
5	ENSMUSG00000029718	Pcolce
6	ENSMUSG00000029759	Pon3
6	ENSMUSG00000029816	Gpnmb
6	ENSMUSG00000029819	Npy
6	ENSMUSG00000029826	Zc3hav1
6	ENSMUSG00000030041	M1ap
6	ENSMUSG00000030064	Frmd4b
6	ENSMUSG00000030087	Klf15
6	ENSMUSG00000030088	Aldh1l1
6	ENSMUSG00000030089	Slc41a3
6	ENSMUSG00000030134	Rasgef1a
6	ENSMUSG00000030208	Emp1
6	ENSMUSG00000030222	Rerg
6	ENSMUSG00000030281	Il17rc
6	ENSMUSG00000030284	Creld1
6	ENSMUSG00000030310	Slc6a1
6	ENSMUSG00000030321	Efcab12
6	ENSMUSG00000030353	Tead4
6	ENSMUSG00000030359	Pzp
7	ENSMUSG00000030413	Pglyrp1
7	ENSMUSG00000030494	Rhpn2
7	ENSMUSG00000030513	Pcsk6
7	ENSMUSG00000030523	Trpm1
7	ENSMUSG00000030638	Sh3gl3
7	ENSMUSG00000030672	Mylpf
7	ENSMUSG00000030693	Klk10
7	ENSMUSG00000030708	Dnajb13
7	ENSMUSG00000030717	Nupr1
7	ENSMUSG00000030722	Nfatc2ip
7	ENSMUSG00000030737	Slco2b1
7	ENSMUSG00000030752	Kdm8
7	ENSMUSG00000030838	Ush1c
7	ENSMUSG00000030897	Cnga4
7	ENSMUSG00000030946	Lhpp
7	ENSMUSG00000030956	Fam53b
7	ENSMUSG00000031027	Stk33
X	ENSMUSG00000031103	Elf4
X	ENSMUSG00000031105	Slc25a14
X	ENSMUSG00000031139	Mcf2
X	ENSMUSG00000031145	Prickle3
X	ENSMUSG00000031165	Was
X	ENSMUSG00000031295	Phka2
X	ENSMUSG00000031304	Il2rg
X	ENSMUSG00000031325	4930519F16Rik
X	ENSMUSG00000031337	Mtm1
X	ENSMUSG00000031380	Figf
X	ENSMUSG00000031381	Piga
X	ENSMUSG00000031384	Asb9
X	ENSMUSG00000031387	Renbp
8	ENSMUSG00000031509	1700016D06Rik
8	ENSMUSG00000031520	Vegfc
8	ENSMUSG00000031548	Sfrp1
8	ENSMUSG00000031549	Ido2
8	ENSMUSG00000031651	Triml1
8	ENSMUSG00000031662	Snx20
8	ENSMUSG00000031750	Il34
8	ENSMUSG00000031757	Mt4
9	ENSMUSG00000031925	Maml2
9	ENSMUSG00000031932	Gpr83
8	ENSMUSG00000031981	Capn9
9	ENSMUSG00000032015	Pou2f3
9	ENSMUSG00000032038	St3gal4
9	ENSMUSG00000032068	Plet1
9	ENSMUSG00000032092	Mpzl2
9	ENSMUSG00000032093	Cd3e
9	ENSMUSG00000032094	Cd3d
9	ENSMUSG00000032122	Slc37a2
9	ENSMUSG00000032194	Kank2
9	ENSMUSG00000032207	Lipc
9	ENSMUSG00000032220	Myo1e
9	ENSMUSG00000032224	Fam81a
9	ENSMUSG00000032261	Sh3bgrl2
9	ENSMUSG00000032271	Nnmt
9	ENSMUSG00000032298	Neil1
9	ENSMUSG00000032315	Cyp1a1
9	ENSMUSG00000032417	Rwdd2a
9	ENSMUSG00000032470	Mras
9	ENSMUSG00000032500	Dclk3
9	ENSMUSG00000032517	Mobp
9	ENSMUSG00000032591	Mst1
9	ENSMUSG00000032602	Slc25a20
4	ENSMUSG00000032726	Bmp8a
5	ENSMUSG00000032754	Slc8b1
10	ENSMUSG00000032788	Pdxk
13	ENSMUSG00000032999	Nlrp4f
18	ENSMUSG00000033022	Cdo1
6	ENSMUSG00000033182	Kbtbd12
2	ENSMUSG00000033213	AA467197
15	ENSMUSG00000033220	Rac2
10	ENSMUSG00000033255	Gm5134
2	ENSMUSG00000033256	Shf
9	ENSMUSG00000033491	Prss35
2	ENSMUSG00000033526	Ppip5k1
9	ENSMUSG00000033590	Myo5c
19	ENSMUSG00000033610	Pank1
17	ENSMUSG00000033826	Dnah8
7	ENSMUSG00000033847	Pla2g4c
7	ENSMUSG00000033961	Zfp446
17	ENSMUSG00000033972	Zfp944
11	ENSMUSG00000033983	Coil
4	ENSMUSG00000033985	Tesk2
11	ENSMUSG00000034121	Mks1
10	ENSMUSG00000034163	Zfc3h1
11	ENSMUSG00000034177	Rnf43
18	ENSMUSG00000034391	Fbxo15
8	ENSMUSG00000034416	Pkd1l2
1	ENSMUSG00000034486	Gbx2
9	ENSMUSG00000034584	Exph5
4	ENSMUSG00000034645	Zyg11a
8	ENSMUSG00000034656	Cacna1a
11	ENSMUSG00000034714	Ttyh2
6	ENSMUSG00000034777	Vax2
10	ENSMUSG00000034792	Gna15
9	ENSMUSG00000034837	Gnat1
4	ENSMUSG00000034853	Acot11
10	ENSMUSG00000034854	Mfsd12
4	ENSMUSG00000034871	Fam151a
7	ENSMUSG00000035064	Eef2k
6	ENSMUSG00000035158	Mitf
17	ENSMUSG00000035186	Ubd
6	ENSMUSG00000035357	Pdzrn3
7	ENSMUSG00000035458	Tnni3
13	ENSMUSG00000035509	Fbxl21
4	ENSMUSG00000035561	Aldh1b1
16	ENSMUSG00000035699	Slc51a
9	ENSMUSG00000035769	Xylb
14	ENSMUSG00000035896	Rnase1
15	ENSMUSG00000036139	Hoxc9
17	ENSMUSG00000036185	Sapcd1
15	ENSMUSG00000036218	Pdzrn4
5	ENSMUSG00000036553	Sh3tc1
3	ENSMUSG00000037016	Frem2
7	ENSMUSG00000037020	Wdr62
10	ENSMUSG00000037031	Tspan15
19	ENSMUSG00000037071	Scd1
4	ENSMUSG00000037188	Grhl3
9	ENSMUSG00000037287	Tbcel
10	ENSMUSG00000037455	Slc18b1
2	ENSMUSG00000037523	Mavs
3	ENSMUSG00000037661	Gpr160
4	ENSMUSG00000037752	Xkr8
10	ENSMUSG00000037762	Slc16a9
14	ENSMUSG00000037833	Sh2d4b
19	ENSMUSG00000037847	Nmrk1
1	ENSMUSG00000037860	Aim2
5	ENSMUSG00000037913	Tmem156
4	ENSMUSG00000038024	Dennd4c
6	ENSMUSG00000038058	Nod1
10	ENSMUSG00000038151	Prdm1
13	ENSMUSG00000038175	Mylip
6	ENSMUSG00000038227	Hoxa9
6	ENSMUSG00000038236	Hoxa7
1	ENSMUSG00000038323	1700066M21Rik
17	ENSMUSG00000038347	Tcte2
10	ENSMUSG00000038481	Cdk19
8	ENSMUSG00000038508	Gdf15
6	ENSMUSG00000038527	C1rl
11	ENSMUSG00000038534	Osbpl7
2	ENSMUSG00000038572	Bpifb5
4	ENSMUSG00000038578	Susd1
4	ENSMUSG00000038668	Lpar1
15	ENSMUSG00000038679	Trps1
7	ENSMUSG00000038763	Alpk3
1	ENSMUSG00000038866	Zcchc2
7	ENSMUSG00000038888	Ctu1
18	ENSMUSG00000038903	Ccdc68
5	ENSMUSG00000039106	Htr5a
2	ENSMUSG00000039145	Camk1d
2	ENSMUSG00000039157	Fam102a
16	ENSMUSG00000039179	Tekt5
17	ENSMUSG00000039193	Nlrc4
7	ENSMUSG00000039194	Rlbp1
16	ENSMUSG00000039209	Rpl39l
1	ENSMUSG00000039246	Lyplal1
1	ENSMUSG00000039349	C130074G19Rik
4	ENSMUSG00000039410	Prdm16
5	ENSMUSG00000039477	Tnrc18
10	ENSMUSG00000039480	Nt5dc1
18	ENSMUSG00000039616	Mocos
5	ENSMUSG00000039623	Ap5z1
2	ENSMUSG00000039648	Ccbl1
15	ENSMUSG00000039676	Capsl
2	ENSMUSG00000039678	Tbc1d13
4	ENSMUSG00000039713	Plekhg5
4	ENSMUSG00000039813	Tbc1d2
7	ENSMUSG00000040026	Saa3
7	ENSMUSG00000040189	Ccdc114
3	ENSMUSG00000040209	Zfp704
3	ENSMUSG00000040213	Ccbl2
4	ENSMUSG00000040296	Ddx58
7	ENSMUSG00000040364	Sec1
11	ENSMUSG00000040483	Xaf1
5	ENSMUSG00000040557	Wbscr27
3	ENSMUSG00000040562	Gstm2
5	ENSMUSG00000040584	Abcb1a
11	ENSMUSG00000040594	Ranbp17
1	ENSMUSG00000040693	Slco4c1
17	ENSMUSG00000040694	Apobec2
14	ENSMUSG00000040701	Ap1g2
14	ENSMUSG00000040721	Zfhx2
14	ENSMUSG00000040726	Hesx1
7	ENSMUSG00000040811	Eml2
4	ENSMUSG00000040860	Crocc
12	ENSMUSG00000040877	Wdr25
9	ENSMUSG00000040936	Ulk4
18	ENSMUSG00000040957	Cables1
9	ENSMUSG00000041064	Pif1
4	ENSMUSG00000041143	Tmco4
16	ENSMUSG00000041205	Map6d1
6	ENSMUSG00000041301	Cftr
7	ENSMUSG00000041309	Nkx6-2
12	ENSMUSG00000041359	Tcl1
6	ENSMUSG00000041390	Mdfic
14	ENSMUSG00000041445	Mmrn2
12	ENSMUSG00000041449	Serpina3h
5	ENSMUSG00000041548	Hspb8
7	ENSMUSG00000041583	Obox6
X	ENSMUSG00000041649	Klf8
11	ENSMUSG00000041654	Slc39a11
1	ENSMUSG00000041782	Lad1
17	ENSMUSG00000041831	Sytl3
13	ENSMUSG00000042102	Dmgdh
3	ENSMUSG00000042312	S100a13
4	ENSMUSG00000042357	Gjb5
4	ENSMUSG00000042367	Gjb3
4	ENSMUSG00000042388	Dlgap3
1	ENSMUSG00000042414	Prdm14
1	ENSMUSG00000042510	AA986860
11	ENSMUSG00000042529	Kcnj12
11	ENSMUSG00000042549	Map2k3os
1	ENSMUSG00000042684	Npl
1	ENSMUSG00000042751	Nmnat2
12	ENSMUSG00000042808	Gpx2
11	ENSMUSG00000042988	Notum
12	ENSMUSG00000043061	Tmem18
14	ENSMUSG00000043157	Arl11
8	ENSMUSG00000043251	Exoc3l
16	ENSMUSG00000043391	2510009E07Rik
4	ENSMUSG00000043572	Pars2
14	ENSMUSG00000043681	Fam25c
4	ENSMUSG00000043924	Ncmap
X	ENSMUSG00000043929	Klhl15
19	ENSMUSG00000044026	Slc35g1
2	ENSMUSG00000044033	Ccdc141
11	ENSMUSG00000044034	Npb
2	ENSMUSG00000044042	Fmn1
2	ENSMUSG00000044103	Il1f9
2	ENSMUSG00000044320	1700001O22Rik
1	ENSMUSG00000044337	Ackr3
18	ENSMUSG00000044393	Dsg2
17	ENSMUSG00000044501	Zfp758
16	ENSMUSG00000044626	Liph
2	ENSMUSG00000044647	Csrnp3
5	ENSMUSG00000044681	Cnpy1
13	ENSMUSG00000044734	Serpinb1a
5	ENSMUSG00000044968	Napepld
15	ENSMUSG00000044986	Tst
3	ENSMUSG00000045092	S1pr1
6	ENSMUSG00000045100	Slc25a26
X	ENSMUSG00000045103	Dmd
14	ENSMUSG00000045107	Saysd1
7	ENSMUSG00000045165	AI467606
X	ENSMUSG00000045180	Shroom2
13	ENSMUSG00000045312	Lhfpl2
17	ENSMUSG00000045378	Pxt1
9	ENSMUSG00000045414	1190002N15Rik
7	ENSMUSG00000045467	Ttll13
11	ENSMUSG00000045667	Smtnl2
6	ENSMUSG00000045709	1700023L04Rik
7	ENSMUSG00000045795	Whamm
2	ENSMUSG00000045822	Zswim3
10	ENSMUSG00000045867	Cradd
5	ENSMUSG00000046000	Naa11
17	ENSMUSG00000046070	Igfals
4	ENSMUSG00000046133	C130073F10Rik
8	ENSMUSG00000046295	Ankle1
4	ENSMUSG00000046312	AI464131
8	ENSMUSG00000046441	Cmtr2
X	ENSMUSG00000046449	C77370
16	ENSMUSG00000046546	Fam43a
16	ENSMUSG00000046598	Bdh1
4	ENSMUSG00000046623	Gjb4
6	ENSMUSG00000046733	Gprc5a
8	ENSMUSG00000046794	Ppp1r3b
11	ENSMUSG00000046974	BC053393
14	ENSMUSG00000047098	Rnf31
2	ENSMUSG00000047250	Ptgs1
9	ENSMUSG00000047412	Zbtb44
5	ENSMUSG00000047501	Cldn4
15	ENSMUSG00000047878	A4galt
5	ENSMUSG00000047881	Rell1
8	ENSMUSG00000048371	Pdp2
5	ENSMUSG00000048373	Fgfbp1
1	ENSMUSG00000048402	Gli2
7	ENSMUSG00000048528	Nkx1-2
9	ENSMUSG00000048534	Amica1
11	ENSMUSG00000048728	Zfp454
17	ENSMUSG00000048826	Dact2
6	ENSMUSG00000049037	Clec4a1
16	ENSMUSG00000049502	Dtx3l
11	ENSMUSG00000049811	Fam161a
10	ENSMUSG00000049872	Fam26e
8	ENSMUSG00000050052	Tdrp
1	ENSMUSG00000050122	Vwa3b
10	ENSMUSG00000050157	Gm867
2	ENSMUSG00000050211	Pla2g4e
4	ENSMUSG00000050234	Gja4
4	ENSMUSG00000050390	C77080
X	ENSMUSG00000050424	Pnma5
9	ENSMUSG00000050555	Hyls1
12	ENSMUSG00000050671	Ism2
2	ENSMUSG00000050737	Ptges
8	ENSMUSG00000050751	Pgbd5
17	ENSMUSG00000050824	Sstr5
7	ENSMUSG00000050973	Gdpgp1
6	ENSMUSG00000051124	Gimap9
7	ENSMUSG00000051207	Mrgprd
X	ENSMUSG00000051224	Tceanc
15	ENSMUSG00000051225	Fam83a
7	ENSMUSG00000051314	Ffar2
1	ENSMUSG00000051344	Plekhm3
2	ENSMUSG00000051747	Ttn
16	ENSMUSG00000052013	Btla
18	ENSMUSG00000052026	Slc6a7
13	ENSMUSG00000052180	Serpinb6c
16	ENSMUSG00000052316	Lrrc15
5	ENSMUSG00000052776	Oas1a
12	ENSMUSG00000052812	Atad2b
16	ENSMUSG00000053062	Jam2
7	ENSMUSG00000053175	Bcl3
7	ENSMUSG00000053198	Prx
7	ENSMUSG00000053367	Gm6792
6	ENSMUSG00000053604	Rpia
11	ENSMUSG00000053654	Krt42
7	ENSMUSG00000053964	Lgals4
13	ENSMUSG00000054021	Sirt5
17	ENSMUSG00000054128	H2-T3
7	ENSMUSG00000054169	Ceacam10
2	ENSMUSG00000054181	A930012O16Rik
7	ENSMUSG00000054662	Ano9
7	ENSMUSG00000055102	Zfp819
7	ENSMUSG00000055116	Arntl
8	ENSMUSG00000055148	Klf2
7	ENSMUSG00000055150	Zfp78
1	ENSMUSG00000055322	Tns1
X	ENSMUSG00000055555	4930502E18Rik
7	ENSMUSG00000055809	Dnaaf3
12	ENSMUSG00000055884	Fancm
7	ENSMUSG00000055978	Fut2
8	ENSMUSG00000056019	Zfp709
18	ENSMUSG00000056124	B4galt6
8	ENSMUSG00000056155	Nanos3
5	ENSMUSG00000056413	Adap1
12	ENSMUSG00000056458	Mok
5	ENSMUSG00000057157	Gm6054
7	ENSMUSG00000057215	Gm15514
11	ENSMUSG00000057534	Gm15698
X	ENSMUSG00000057836	Xlr3a
11	ENSMUSG00000057948	Unc13d
12	ENSMUSG00000057963	Itpk1
9	ENSMUSG00000057969	Sema3b
13	ENSMUSG00000058022	Adtrp
19	ENSMUSG00000058216	BC021614
11	ENSMUSG00000058755	Osm
6	ENSMUSG00000058979	Cecr5
12	ENSMUSG00000059060	Rad51b
16	ENSMUSG00000059305	Vpreb1
9	ENSMUSG00000059412	Fxyd2
1	ENSMUSG00000059498	Fcgr3
7	ENSMUSG00000059824	Dbp
8	ENSMUSG00000059854	Hydin
15	ENSMUSG00000059883	Irak4
11	ENSMUSG00000060180	Myh13
17	ENSMUSG00000060586	H2-Eb1
3	ENSMUSG00000060671	Atp8b2
11	ENSMUSG00000061086	Myl4
17	ENSMUSG00000061126	Cyp4f39
12	ENSMUSG00000061533	Cep128
8	ENSMUSG00000062007	Hsh2d
5	ENSMUSG00000062110	Scfd2
9	ENSMUSG00000062309	Rpp25
9	ENSMUSG00000062794	Zfp599
10	ENSMUSG00000062866	Phactr2
17	ENSMUSG00000063011	Msln
15	ENSMUSG00000063296	Tmem117
12	ENSMUSG00000063450	Syne2
7	ENSMUSG00000063903	Klk1
12	ENSMUSG00000064215	Ifi27
2	ENSMUSG00000064263	Gm1631
5	ENSMUSG00000064267	Hvcn1
1	ENSMUSG00000064294	Aox3
17	ENSMUSG00000064308	2410137M14Rik
MT	ENSMUSG00000064336	mt-Tf
MT	ENSMUSG00000064338	mt-Tv
6	ENSMUSG00000065604	Mir29b-1
4	ENSMUSG00000065778	Gm22154
7	ENSMUSG00000066258	Trim12a
12	ENSMUSG00000066363	Serpina3f
12	ENSMUSG00000066440	Zfyve26
1	ENSMUSG00000066652	Lefty2
5	ENSMUSG00000066861	Oas1g
5	ENSMUSG00000066894	Vsig10
7	ENSMUSG00000067616	Klk11
6	ENSMUSG00000067714	Lpar5
X	ENSMUSG00000068048	Rhox9
15	ENSMUSG00000068226	Gm6723
14	ENSMUSG00000068245	Phf11d
6	ENSMUSG00000068323	Slc4a5
6	ENSMUSG00000068327	Tlx2
Y	ENSMUSG00000069053	Uba1y
7	ENSMUSG00000069727	Gm5595
9	ENSMUSG00000070305	Mpzl3
11	ENSMUSG00000070327	Rnf213
5	ENSMUSG00000070473	Cldn3
1	ENSMUSG00000070532	1700084C01Rik
4	ENSMUSG00000070637	Gm694
1	ENSMUSG00000070643	Sox13
4	ENSMUSG00000070737	Gm12942
4	ENSMUSG00000070803	Cited4
13	ENSMUSG00000071295	Gm10323
12	ENSMUSG00000073197	5730507C01Rik
17	ENSMUSG00000073403	Gm10499
17	ENSMUSG00000073413	Ly6g6d
1	ENSMUSG00000073538	E330020D12Rik
18	ENSMUSG00000073568	Arl14epl
18	ENSMUSG00000073598	1700066B19Rik
1	ENSMUSG00000073650	Catip
1	ENSMUSG00000073652	Apol7d
1	ENSMUSG00000073678	Pgap1
7	ENSMUSG00000074071	Fam169b
8	ENSMUSG00000074136	4930513N10Rik
7	ENSMUSG00000074158	9830147E19Rik
7	ENSMUSG00000074170	Plekhf1
7	ENSMUSG00000074199	Krtdap
3	ENSMUSG00000074207	Adh1
8	ENSMUSG00000074217	2210011C24Rik
7	ENSMUSG00000074218	Cox7a1
7	ENSMUSG00000074220	Zfp382
7	ENSMUSG00000074365	Crxos
9	ENSMUSG00000074397	Foxr1
3	ENSMUSG00000074483	Bglap
3	ENSMUSG00000074489	Bglap3
2	ENSMUSG00000074519	Etohi1
2	ENSMUSG00000074576	Mocs3
2	ENSMUSG00000074593	Spint5
2	ENSMUSG00000074652	Myh7b
3	ENSMUSG00000074653	Lrrc31
10	ENSMUSG00000074802	Gas2l3
13	ENSMUSG00000074863	Gm5665
2	ENSMUSG00000075023	Accsl
2	ENSMUSG00000075284	Wipf1
2	ENSMUSG00000075304	Sp5
15	ENSMUSG00000075394	Hoxc4
15	ENSMUSG00000075555	Gm10863
14	ENSMUSG00000075592	Nynrin
15	ENSMUSG00000075602	Ly6a
11	ENSMUSG00000075611	Gm11545
12	ENSMUSG00000075707	Dio3
2	ENSMUSG00000076309	Mir147
13	ENSMUSG00000078302	Foxd1
4	ENSMUSG00000078508	Gm13128
4	ENSMUSG00000078509	Pramef17
11	ENSMUSG00000078706	Gm53
7	ENSMUSG00000078779	Zfp59
2	ENSMUSG00000078861	Zfp931
2	ENSMUSG00000078864	Gm14322
2	ENSMUSG00000078866	Gm14420
2	ENSMUSG00000078868	Gm14412
2	ENSMUSG00000078902	Gm14443
18	ENSMUSG00000078963	Hsbp1l1
12	ENSMUSG00000079014	Serpina3i
8	ENSMUSG00000079038	D130040H23Rik
9	ENSMUSG00000079260	Tmppe
2	ENSMUSG00000079484	Phyhd1
2	ENSMUSG00000079497	Gm13420
X	ENSMUSG00000079871	Gm4984
2	ENSMUSG00000081037	Gm13929
4	ENSMUSG00000081490	Gm11830
5	ENSMUSG00000081683	Fzd10
11	ENSMUSG00000081766	2210409E12Rik
2	ENSMUSG00000082313	Gm11701
4	ENSMUSG00000082352	Gm13228
2	ENSMUSG00000082514	Gm11452
2	ENSMUSG00000082701	Gm14460
4	ENSMUSG00000082758	Gm13024
2	ENSMUSG00000082765	Gm14411
X	ENSMUSG00000083307	AA414768
17	ENSMUSG00000083534	H2-M6-ps
4	ENSMUSG00000083679	Gm12892
2	ENSMUSG00000083817	Gm14400
1	ENSMUSG00000084799	Ino80dos
9	ENSMUSG00000084911	Gm16185
13	ENSMUSG00000085024	C230035I16Rik
11	ENSMUSG00000085152	Gm11496
2	ENSMUSG00000085317	Gssos2
4	ENSMUSG00000085403	Gm13068
5	ENSMUSG00000085455	1810059H22Rik
2	ENSMUSG00000085491	4930527E20Rik
10	ENSMUSG00000085662	Gm16220
6	ENSMUSG00000085794	Vax2os
4	ENSMUSG00000085823	Gm13012
17	ENSMUSG00000085912	Trp53cor1
11	ENSMUSG00000085972	1110028F11Rik
5	ENSMUSG00000086219	Srrm4os
11	ENSMUSG00000086391	1700042O10Rik
5	ENSMUSG00000086494	2210417A02Rik
11	ENSMUSG00000086507	Adap2os
2	ENSMUSG00000086563	Gm14136
11	ENSMUSG00000086591	Dnah2os
16	ENSMUSG00000086645	Gm15743
5	ENSMUSG00000086655	C330018A13Rik
7	ENSMUSG00000086784	Isoc2a
4	ENSMUSG00000086810	Gm13110
9	ENSMUSG00000087135	Gm16096
2	ENSMUSG00000087187	Gm13431
X	ENSMUSG00000087193	Gm14820
2	ENSMUSG00000087283	Gm13580
5	ENSMUSG00000087292	Gm13832
4	ENSMUSG00000087307	Gm12925
3	ENSMUSG00000087411	Gm16048
2	ENSMUSG00000087616	Gm14257
2	ENSMUSG00000087648	E130018N17Rik
X	ENSMUSG00000087677	Gm15226
17	ENSMUSG00000089255	Snora78
7	ENSMUSG00000089661	Mia
10	ENSMUSG00000089835	Gm7097
11	ENSMUSG00000089876	Tmem102
7	ENSMUSG00000089987	Gpx2-ps1
8	ENSMUSG00000090039	Gm15894
2	ENSMUSG00000090093	Gm14399
17	ENSMUSG00000090115	Usp49
9	ENSMUSG00000090470	2410012M07Rik
14	ENSMUSG00000091110	Gm2832
5	ENSMUSG00000091273	Gm6673
8	ENSMUSG00000091490	Triml2
14	ENSMUSG00000091649	Phf11b
2	ENSMUSG00000091703	Gm4222
14	ENSMUSG00000092109	Gm9376
19	ENSMUSG00000092274	Neat1
7	ENSMUSG00000092335	Gm7221
17	ENSMUSG00000092390	Gm20541
17	ENSMUSG00000093622	Gm20703
14	ENSMUSG00000093726	Gm20667
14	ENSMUSG00000094151	Gm7233
7	ENSMUSG00000094462	Gm21028
4	ENSMUSG00000094595	Fsbp
17	ENSMUSG00000095990	Zfp97
16	ENSMUSG00000096215	Smim22
6	ENSMUSG00000097048	1600020E01Rik
11	ENSMUSG00000097062	Gm17586
10	ENSMUSG00000097076	C330046G13Rik
9	ENSMUSG00000097258	Gm26767
17	ENSMUSG00000097282	5031415H12Rik
16	ENSMUSG00000097290	1300002E11Rik
13	ENSMUSG00000097326	A330048O09Rik
14	ENSMUSG00000097542	Gm26751
17	ENSMUSG00000097567	Gm26637
14	ENSMUSG00000097589	Dleu2
9	ENSMUSG00000097651	4930461G14Rik
5	ENSMUSG00000097686	Gm26647
12	ENSMUSG00000097758	Dio3os
16	ENSMUSG00000097768	2310043M15Rik
13	ENSMUSG00000097848	Gm807
X	ENSMUSG00000098078	Gm26992
14	ENSMUSG00000098088	Gm26916
18	ENSMUSG00000098098	Gm20748
14	ENSMUSG00000098183	Gm27010
9	ENSMUSG00000098894	Gm27234
14	ENSMUSG00000098967	Gm27845
15	ENSMUSG00000099083	Atf7
1	ENSMUSG00000099343	Gm28836
17	ENSMUSG00000099474	1700097N02Rik
9	ENSMUSG00000099539	Gm8282
5	ENSMUSG00000100704	Gm28434
1	ENSMUSG00000100908	Gm28888
14	ENSMUSG00000101009	1700108F19Rik
6	ENSMUSG00000101191	Gm28809
1	ENSMUSG00000101549	Gm29630
17	ENSMUSG00000101959	Ldhal6b
1	ENSMUSG00000102185	RP24-170O7.1
1	ENSMUSG00000102343	RP23-333I7.1
1	ENSMUSG00000102367	Kiss1
1	ENSMUSG00000102633	RP23-278E1.4
1	ENSMUSG00000103292	RP24-393L8.1
9	ENSMUSG00000103835	RP23-201C3.5
1	ENSMUSG00000104340	RP24-65D16.4
