# Supplementary material for: Single-cell analyses of X Chromosome inactivation dynamics and pluripotency during differentiation
Source: Genome Res. 2016 Oct;26(10):1342–54. doi: 10.1101/gr.201954.115 (PMC5052059; doi:10.1101/gr.201954.115)
Supplement: Supplemental Material [file supp_gr.201954.115_Supplemental_Table_S2.xlsx]

## Sheet: table
Supplemental Table S2. Genes with enriched expression in ES condition
Chromosome	Ensembl gene ID	Symbol
10	ENSMUSG00000000730	Dnmt3l
10	ENSMUSG00000000731	Aire
10	ENSMUSG00000000732	Icosl
3	ENSMUSG00000001025	S100a6
15	ENSMUSG00000001281	Itgb7
15	ENSMUSG00000001288	Rarg
X	ENSMUSG00000002006	Pdzd4
8	ENSMUSG00000004630	Pcp2
17	ENSMUSG00000004864	Mapk13
7	ENSMUSG00000006649	Nphs1
1	ENSMUSG00000007122	Casq1
8	ENSMUSG00000009628	Tex15
X	ENSMUSG00000009670	Tex11
11	ENSMUSG00000010122	Slc47a1
7	ENSMUSG00000011751	Sptbn4
2	ENSMUSG00000016458	Wt1
15	ENSMUSG00000016758	Bik
10	ENSMUSG00000019989	Enpp3
10	ENSMUSG00000020059	Sycp3
11	ENSMUSG00000020475	Pgam2
12	ENSMUSG00000020661	Dnmt3a
12	ENSMUSG00000021098	4930447C04Rik
13	ENSMUSG00000021758	Ddx4
14	ENSMUSG00000022094	Slc39a14
15	ENSMUSG00000022429	Dmc1
15	ENSMUSG00000022432	Smc1b
16	ENSMUSG00000022683	Pla2g10
17	ENSMUSG00000023826	Park2
17	ENSMUSG00000024114	Prss41
17	ENSMUSG00000024300	Myo1f
18	ENSMUSG00000024530	Slmo1
19	ENSMUSG00000024837	Dmrt1
7	ENSMUSG00000025480	Syce1
1	ENSMUSG00000026532	Spta1
2	ENSMUSG00000026873	Phf19
2	ENSMUSG00000027171	Prrg4
2	ENSMUSG00000027356	Fermt1
2	ENSMUSG00000027359	Slc27a2
3	ENSMUSG00000027855	Sycp1
3	ENSMUSG00000028109	Hormad1
4	ENSMUSG00000028391	Wdr31
4	ENSMUSG00000028536	2610528J11Rik
4	ENSMUSG00000028680	Plk3
4	ENSMUSG00000028825	Rhd
4	ENSMUSG00000028874	Fgr
4	ENSMUSG00000029026	Trp73
5	ENSMUSG00000029205	Chrna9
5	ENSMUSG00000029601	Iqcd
6	ENSMUSG00000029848	Stra8
6	ENSMUSG00000029913	Prdm5
6	ENSMUSG00000030270	Cpne9
7	ENSMUSG00000030669	Calca
7	ENSMUSG00000030701	Plekhb1
7	ENSMUSG00000030742	Lat
7	ENSMUSG00000030769	Slc5a11
X	ENSMUSG00000031160	Eras
9	ENSMUSG00000032202	Rab27a
14	ENSMUSG00000033644	Piwil2
17	ENSMUSG00000034786	Gpsm3
10	ENSMUSG00000035486	Plk5
19	ENSMUSG00000036098	Myrf
6	ENSMUSG00000036390	Gadd45a
5	ENSMUSG00000037108	Zcwpw1
7	ENSMUSG00000037166	Ppp1r14a
3	ENSMUSG00000038393	Txnip
5	ENSMUSG00000038569	Rad9b
9	ENSMUSG00000038884	A230050P20Rik
2	ENSMUSG00000038932	Tcfl5
1	ENSMUSG00000040629	Mael
7	ENSMUSG00000040650	Cyp2b23
16	ENSMUSG00000041774	Ydjc
8	ENSMUSG00000043687	1190005I06Rik
9	ENSMUSG00000043895	S1pr2
19	ENSMUSG00000044065	Gm9788
1	ENSMUSG00000044816	D630023F18Rik
X	ENSMUSG00000045010	Gm4779
19	ENSMUSG00000045826	Ptprcap
7	ENSMUSG00000047751	Utf1
9	ENSMUSG00000048752	Prss50
5	ENSMUSG00000049387	Cox7b2
19	ENSMUSG00000050623	Tex40
4	ENSMUSG00000050854	Tmem125
11	ENSMUSG00000051455	Gm1564
7	ENSMUSG00000054065	Pkp3
3	ENSMUSG00000054379	2410024N13Rik
11	ENSMUSG00000054418	2900041M22Rik
5	ENSMUSG00000055235	Wdr86
X	ENSMUSG00000055780	Usp26
2	ENSMUSG00000056436	Cyct
X	ENSMUSG00000057615	Ldoc1
4	ENSMUSG00000059816	Fam159a
10	ENSMUSG00000059901	Adamts14
1	ENSMUSG00000060715	1700019A02Rik
8	ENSMUSG00000061048	Cdh3
1	ENSMUSG00000062939	Stat4
2	ENSMUSG00000065840	Gm25187
8	ENSMUSG00000065952	C330021F23Rik
7	ENSMUSG00000066500	Izumo2
2	ENSMUSG00000068079	Tcf15
13	ENSMUSG00000068324	Gm10029
3	ENSMUSG00000069041	Slc25a31
13	ENSMUSG00000069170	Gpr98
10	ENSMUSG00000069516	Lyz2
X	ENSMUSG00000072249	Gm5635
X	ENSMUSG00000073294	AU022751
13	ENSMUSG00000076430	Hus1b
4	ENSMUSG00000078689	Mup6
7	ENSMUSG00000078815	Cacng6
15	ENSMUSG00000078932	CN725425
15	ENSMUSG00000078938	Syce3
12	ENSMUSG00000079012	Serpina3m
9	ENSMUSG00000079681	Zglp1
2	ENSMUSG00000079966	Gm14058
5	ENSMUSG00000081104	Gm15989
X	ENSMUSG00000082423	Gm15148
X	ENSMUSG00000083123	Gm6826
6	ENSMUSG00000083620	Gm15529
3	ENSMUSG00000084912	Gm16078
6	ENSMUSG00000085412	Halr1
3	ENSMUSG00000085773	Gm16233
X	ENSMUSG00000086807	C330013F16Rik
9	ENSMUSG00000091345	Col6a5
7	ENSMUSG00000092367	Gm20479
1	ENSMUSG00000097113	Gm19705
1	ENSMUSG00000097398	2410088K16Rik
1	ENSMUSG00000097448	Gm16880
15	ENSMUSG00000097536	2610037D02Rik
8	ENSMUSG00000100605	Gm29243
1	ENSMUSG00000102700	RP24-396E16.1
10	ENSMUSG00000104090	RP23-193J20.4
