# Supplementary material for: Single-cell analyses of X Chromosome inactivation dynamics and pluripotency during differentiation
Source: Genome Res. 2016 Oct;26(10):1342–54. doi: 10.1101/gr.201954.115 (PMC5052059; doi:10.1101/gr.201954.115)
Supplement: Supplemental Material [file supp_gr.201954.115_Supplemental_Table_S3.xlsx]

## Sheet: table
Supplemental Table S3. Genes with enriched expression in Epi condition
Chromosome	Ensembl gene ID	Symbol
11	ENSMUSG00000000125	Wnt3
9	ENSMUSG00000000167	Pih1d2
11	ENSMUSG00000000301	Pemt
15	ENSMUSG00000000555	Itga5
11	ENSMUSG00000000567	Sox9
11	ENSMUSG00000000617	Grm6
11	ENSMUSG00000000805	Car4
11	ENSMUSG00000000861	Bcl11a
14	ENSMUSG00000000957	Mmp14
7	ENSMUSG00000001247	Lsr
6	ENSMUSG00000001521	Tulp3
11	ENSMUSG00000001555	Fkbp10
11	ENSMUSG00000001583	Tnk1
6	ENSMUSG00000001761	Smo
2	ENSMUSG00000001864	Aif1l
12	ENSMUSG00000002688	Prkd1
7	ENSMUSG00000003436	Dll3
11	ENSMUSG00000003934	Efnb3
7	ENSMUSG00000004328	Hif3a
14	ENSMUSG00000004562	Arhgef40
9	ENSMUSG00000004661	Arid3b
6	ENSMUSG00000005503	Evx1
8	ENSMUSG00000005534	Insr
9	ENSMUSG00000006235	Epor
19	ENSMUSG00000006270	Vax1
16	ENSMUSG00000006958	Chrd
7	ENSMUSG00000008318	Relt
2	ENSMUSG00000009216	Fam163b
1	ENSMUSG00000009633	G0s2
9	ENSMUSG00000010066	Cacna2d2
1	ENSMUSG00000010311	Optc
6	ENSMUSG00000010797	Wnt2
12	ENSMUSG00000011148	Adssl1
18	ENSMUSG00000012282	Wnt8a
17	ENSMUSG00000014773	Dll1
2	ENSMUSG00000015090	Ptgds
1	ENSMUSG00000015843	Rxrg
2	ENSMUSG00000017002	Slpi
11	ENSMUSG00000017493	Igfbp4
11	ENSMUSG00000017607	Tns4
2	ENSMUSG00000017652	Cd40
2	ENSMUSG00000017667	Zfp334
11	ENSMUSG00000018570	2810408A11Rik
12	ENSMUSG00000018581	Dnah11
11	ENSMUSG00000018698	Lhx1
7	ENSMUSG00000018909	Arrb1
11	ENSMUSG00000018924	Alox15
11	ENSMUSG00000018973	Hoxb1
18	ENSMUSG00000019647	Sema6a
7	ENSMUSG00000019734	Tmc4
10	ENSMUSG00000019790	Stxbp5
10	ENSMUSG00000019853	Hebp2
10	ENSMUSG00000019880	Rspo3
10	ENSMUSG00000019960	Dusp6
10	ENSMUSG00000020105	Lrig3
11	ENSMUSG00000020303	Stc2
11	ENSMUSG00000020439	Smtn
11	ENSMUSG00000020467	Efemp1
11	ENSMUSG00000020473	Aebp1
11	ENSMUSG00000020546	Stxbp4
11	ENSMUSG00000020553	Pctp
12	ENSMUSG00000020642	Rnf144a
11	ENSMUSG00000020695	Mrc2
11	ENSMUSG00000020734	Grin2c
11	ENSMUSG00000020808	Fam64a
12	ENSMUSG00000021095	Gsc
12	ENSMUSG00000021175	Cdca7l
12	ENSMUSG00000021209	Ppp4r4
12	ENSMUSG00000021281	Tnfaip2
12	ENSMUSG00000021294	Kif26a
13	ENSMUSG00000021318	Gli3
13	ENSMUSG00000021567	Nkd2
13	ENSMUSG00000021589	Rhobtb3
14	ENSMUSG00000021848	Otx2
14	ENSMUSG00000021902	Phf7
14	ENSMUSG00000021978	Extl3
14	ENSMUSG00000021990	Spata13
14	ENSMUSG00000021994	Wnt5a
14	ENSMUSG00000022091	Sorbs3
14	ENSMUSG00000022203	Efs
15	ENSMUSG00000022367	Has2
16	ENSMUSG00000022885	St6gal1
15	ENSMUSG00000023033	Scn8a
2	ENSMUSG00000023206	Il15ra
17	ENSMUSG00000023809	Rps6ka2
17	ENSMUSG00000023873	1700010I14Rik
17	ENSMUSG00000023963	Cyp39a1
17	ENSMUSG00000024064	Galnt14
17	ENSMUSG00000024134	Six2
17	ENSMUSG00000024247	Pkdcc
18	ENSMUSG00000024304	Cdh2
17	ENSMUSG00000024409	Psors1c2
18	ENSMUSG00000024427	Spry4
18	ENSMUSG00000024521	Pmaip1
19	ENSMUSG00000024697	Gna14
19	ENSMUSG00000024924	Vldlr
19	ENSMUSG00000024987	Cyp26a1
11	ENSMUSG00000025161	Slc16a3
19	ENSMUSG00000025172	Ankrd2
19	ENSMUSG00000025219	Fgf8
X	ENSMUSG00000025597	Klhl4
X	ENSMUSG00000025666	Tmem47
1	ENSMUSG00000026029	Casp8
1	ENSMUSG00000026124	Cfc1
1	ENSMUSG00000026207	Speg
1	ENSMUSG00000026307	Scly
1	ENSMUSG00000026475	Rgs16
1	ENSMUSG00000026482	Rgl1
1	ENSMUSG00000026497	Mixl1
1	ENSMUSG00000026519	Tmem63a
1	ENSMUSG00000026525	Opn3
1	ENSMUSG00000026579	F5
1	ENSMUSG00000026640	Plxna2
1	ENSMUSG00000026649	1700009P17Rik
1	ENSMUSG00000026678	Rgs5
1	ENSMUSG00000026694	Mettl13
2	ENSMUSG00000026748	Plxdc2
2	ENSMUSG00000026765	Lypd6b
2	ENSMUSG00000026768	Itga8
2	ENSMUSG00000026837	Col5a1
2	ENSMUSG00000026994	Galnt3
2	ENSMUSG00000027004	Frzb
2	ENSMUSG00000027368	Dusp2
2	ENSMUSG00000027524	Edn3
3	ENSMUSG00000027559	Car3
3	ENSMUSG00000027562	Car2
3	ENSMUSG00000027840	Wnt2b
3	ENSMUSG00000028039	Efna3
3	ENSMUSG00000028059	Arhgef2
4	ENSMUSG00000028402	Mpdz
4	ENSMUSG00000028464	Tpm2
4	ENSMUSG00000028542	Slc6a9
4	ENSMUSG00000028654	Mycl
4	ENSMUSG00000028751	Pla2g2e
4	ENSMUSG00000028753	Vwa5b1
4	ENSMUSG00000028799	Zfp362
4	ENSMUSG00000029070	Mxra8
5	ENSMUSG00000029086	Prom1
5	ENSMUSG00000029108	Pcdh7
5	ENSMUSG00000029337	Fgf5
5	ENSMUSG00000029570	Lfng
5	ENSMUSG00000029650	Slc46a3
5	ENSMUSG00000029710	Ephb4
6	ENSMUSG00000029797	Sspo
6	ENSMUSG00000029798	Herc6
6	ENSMUSG00000029851	Fam115c
6	ENSMUSG00000029859	Epha1
6	ENSMUSG00000029864	Gstk1
6	ENSMUSG00000030107	Usp18
6	ENSMUSG00000030123	Plxnd1
6	ENSMUSG00000030319	Cand2
7	ENSMUSG00000030393	Zik1
7	ENSMUSG00000030544	Mesp1
7	ENSMUSG00000030630	Fah
7	ENSMUSG00000030699	Tbx6
7	ENSMUSG00000030747	Dgat2
7	ENSMUSG00000030760	Acer3
7	ENSMUSG00000030796	Tead2
7	ENSMUSG00000031073	Fgf15
X	ENSMUSG00000031093	Dock11
X	ENSMUSG00000031112	Stk26
X	ENSMUSG00000031209	Heph
8	ENSMUSG00000031530	Dusp4
8	ENSMUSG00000031595	Pdgfrl
8	ENSMUSG00000031636	Pdlim3
8	ENSMUSG00000031654	Cbln1
8	ENSMUSG00000031661	Nkd1
8	ENSMUSG00000031778	Cx3cl1
8	ENSMUSG00000031880	Rrad
8	ENSMUSG00000031891	Hsd11b2
9	ENSMUSG00000032184	Lysmd2
9	ENSMUSG00000032232	Cgnl1
9	ENSMUSG00000032258	Lca5
9	ENSMUSG00000032380	Dapk2
9	ENSMUSG00000032446	Eomes
9	ENSMUSG00000032497	Lrrfip2
4	ENSMUSG00000032643	Fhl3
17	ENSMUSG00000032717	Mdfi
7	ENSMUSG00000032737	Inppl1
13	ENSMUSG00000033102	Cdc14b
15	ENSMUSG00000033170	Card10
4	ENSMUSG00000033326	Kdm4a
9	ENSMUSG00000033350	Chst2
X	ENSMUSG00000033436	Armcx2
1	ENSMUSG00000033722	BC034090
X	ENSMUSG00000033737	Fndc3c1
10	ENSMUSG00000034057	Myrfl
14	ENSMUSG00000034532	Fbxo16
9	ENSMUSG00000034684	Sema3f
11	ENSMUSG00000034936	Arl4d
X	ENSMUSG00000035045	Zc3h12b
9	ENSMUSG00000035274	Tpbg
4	ENSMUSG00000035305	Ror1
12	ENSMUSG00000035799	Twist1
11	ENSMUSG00000035849	Krt222
9	ENSMUSG00000036030	Prtg
2	ENSMUSG00000036040	Adamtsl2
18	ENSMUSG00000036103	Colec12
14	ENSMUSG00000036422	Pcdh8
12	ENSMUSG00000036523	Greb1
3	ENSMUSG00000036885	Arhgef26
15	ENSMUSG00000037003	Tenc1
X	ENSMUSG00000037010	Apln
4	ENSMUSG00000037306	Man1c1
11	ENSMUSG00000037335	Hand1
X	ENSMUSG00000037347	Chst7
1	ENSMUSG00000037408	Cnnm4
17	ENSMUSG00000037446	Tulp1
9	ENSMUSG00000037784	Dzip1l
3	ENSMUSG00000037892	Pcdh18
6	ENSMUSG00000038022	Fam188b
13	ENSMUSG00000038132	Rbm24
4	ENSMUSG00000038192	Cer1
3	ENSMUSG00000038256	Bcl9
3	ENSMUSG00000038526	Car14
2	ENSMUSG00000038718	Pbx3
1	ENSMUSG00000038855	Itpkb
8	ENSMUSG00000038894	Irs2
17	ENSMUSG00000039316	Rftn1
2	ENSMUSG00000039621	Prex1
9	ENSMUSG00000040204	2810417H13Rik
10	ENSMUSG00000040258	Nxph4
10	ENSMUSG00000040280	Ndufa4l2
19	ENSMUSG00000040929	Rfx3
11	ENSMUSG00000040978	Gm11992
7	ENSMUSG00000041117	Ccdc8
7	ENSMUSG00000041187	Prkd2
6	ENSMUSG00000041377	Ninj2
18	ENSMUSG00000041482	Piezo2
X	ENSMUSG00000041688	Amot
13	ENSMUSG00000041995	Zbed3
9	ENSMUSG00000042106	Fam212a
5	ENSMUSG00000042249	Adrbk2
14	ENSMUSG00000042286	Stab1
11	ENSMUSG00000042436	Mfap4
6	ENSMUSG00000042607	Asb4
7	ENSMUSG00000042675	Ypel3
2	ENSMUSG00000042821	Snai1
16	ENSMUSG00000043008	Klhl6
3	ENSMUSG00000043165	Lor
5	ENSMUSG00000043279	Trim56
5	ENSMUSG00000044134	Fam109a
7	ENSMUSG00000044317	Gpr4
2	ENSMUSG00000044338	Aplnr
12	ENSMUSG00000044548	Dact1
17	ENSMUSG00000045027	Prss22
9	ENSMUSG00000045087	S1pr5
1	ENSMUSG00000045382	Cxcr4
1	ENSMUSG00000045658	Pid1
17	ENSMUSG00000045842	Gm7148
11	ENSMUSG00000045877	4933415A04Rik
8	ENSMUSG00000046714	Foxc2
7	ENSMUSG00000046750	BC089491
5	ENSMUSG00000046798	Cldn12
12	ENSMUSG00000047002	Msgn1
10	ENSMUSG00000047090	Tmem198b
1	ENSMUSG00000047443	Fam132b
6	ENSMUSG00000047976	Kcna1
6	ENSMUSG00000048022	Tmem229a
3	ENSMUSG00000048332	Lhfp
5	ENSMUSG00000048450	Msx1
12	ENSMUSG00000048562	Sp8
3	ENSMUSG00000049504	Proser1
19	ENSMUSG00000049670	Morn4
4	ENSMUSG00000050105	Grrp1
11	ENSMUSG00000050288	Fzd2
X	ENSMUSG00000050379	Sept6
10	ENSMUSG00000050953	Gja1
11	ENSMUSG00000051043	Gprc5c
10	ENSMUSG00000051354	Samd3
X	ENSMUSG00000051851	Cxx1c
19	ENSMUSG00000052085	Dock8
1	ENSMUSG00000052534	Pbx1
18	ENSMUSG00000052713	Zfp608
13	ENSMUSG00000052957	Gas1
5	ENSMUSG00000054675	Tmem119
1	ENSMUSG00000054702	Ap1s3
13	ENSMUSG00000054889	Dsp
17	ENSMUSG00000054951	9130008F23Rik
X	ENSMUSG00000055653	Gpc3
1	ENSMUSG00000055866	Per2
5	ENSMUSG00000057244	Gm6139
4	ENSMUSG00000057530	Ece1
5	ENSMUSG00000057816	1700007G11Rik
X	ENSMUSG00000058252	1700008I05Rik
2	ENSMUSG00000058620	Adra2b
10	ENSMUSG00000058806	Col13a1
17	ENSMUSG00000061232	H2-K1
14	ENSMUSG00000061524	Zic2
19	ENSMUSG00000062432	Cyp26c1
5	ENSMUSG00000062960	Kdr
11	ENSMUSG00000063564	Col23a1
2	ENSMUSG00000064289	Tank
6	ENSMUSG00000064563	Snora7a
5	ENSMUSG00000065304	Gm23245
3	ENSMUSG00000065413	Mir367
3	ENSMUSG00000065447	Mir302d
3	ENSMUSG00000065482	Mir302c
3	ENSMUSG00000065552	Mir302a
18	ENSMUSG00000065922	n-R5-8s1
4	ENSMUSG00000066107	Gm12666
4	ENSMUSG00000066224	Arid3c
9	ENSMUSG00000066456	Hmgn3
15	ENSMUSG00000068114	Ccdc134
2	ENSMUSG00000068373	D430041D05Rik
6	ENSMUSG00000068699	Flnc
2	ENSMUSG00000068735	Trp53i11
18	ENSMUSG00000069378	Prdm6
12	ENSMUSG00000069755	Zfp125
11	ENSMUSG00000069763	Tmem100
17	ENSMUSG00000071042	Rasgrp3
12	ENSMUSG00000071235	Vrtn
X	ENSMUSG00000071719	Tmem28
5	ENSMUSG00000072874	Gm6116
6	ENSMUSG00000073096	Lrrc61
17	ENSMUSG00000073405	C920025E04Rik
17	ENSMUSG00000073409	H2-Q6
17	ENSMUSG00000073424	Cyp4f15
7	ENSMUSG00000073982	Rhog
7	ENSMUSG00000073985	Gm10602
2	ENSMUSG00000075324	Fign
3	ENSMUSG00000076252	Mir302b
17	ENSMUSG00000077709	Snora64
2	ENSMUSG00000077714	Snord17
2	ENSMUSG00000078202	Nrarp
4	ENSMUSG00000078485	Plekhn1
4	ENSMUSG00000078719	Msmp
12	ENSMUSG00000079017	Ifi27l2a
2	ENSMUSG00000079442	St6galnac4
9	ENSMUSG00000079915	Gm16073
4	ENSMUSG00000080059	Rps19-ps3
16	ENSMUSG00000080790	Gm7638
2	ENSMUSG00000080982	Gm13549
6	ENSMUSG00000082199	Gm15763
2	ENSMUSG00000082328	Gm13921
2	ENSMUSG00000083503	Gm13407
X	ENSMUSG00000083602	Gm14911
X	ENSMUSG00000084125	Gm8757
2	ENSMUSG00000085025	Gm13715
2	ENSMUSG00000085135	Gm13713
6	ENSMUSG00000085355	3010003L21Rik
14	ENSMUSG00000085555	2610035F20Rik
X	ENSMUSG00000085587	Gm14493
4	ENSMUSG00000085626	Gm12898
10	ENSMUSG00000085666	Gm9855
13	ENSMUSG00000085936	2610307P16Rik
6	ENSMUSG00000086126	5730457N03Rik
7	ENSMUSG00000086502	B130055M24Rik
15	ENSMUSG00000086541	Has2os
11	ENSMUSG00000087211	Lhx1os
8	ENSMUSG00000088025	Rprl3
6	ENSMUSG00000088595	Gm24601
6	ENSMUSG00000090164	BC035044
9	ENSMUSG00000091003	Gm7244
2	ENSMUSG00000091037	Gm17661
4	ENSMUSG00000091237	Gm17114
13	ENSMUSG00000091423	Gm17509
17	ENSMUSG00000091705	H2-Q2
5	ENSMUSG00000092674	Gm24105
4	ENSMUSG00000092680	Snord55
18	ENSMUSG00000092702	Gm24514
9	ENSMUSG00000092805	Gm26461
14	ENSMUSG00000092837	Rpph1
11	ENSMUSG00000093006	Gm24157
1	ENSMUSG00000093064	Gm23153
8	ENSMUSG00000093112	Gm22701
4	ENSMUSG00000093183	Gm25687
X	ENSMUSG00000095562	Gm21887
18	ENSMUSG00000097080	1700086O06Rik
11	ENSMUSG00000097173	Gm26829
15	ENSMUSG00000097221	1810049J17Rik
15	ENSMUSG00000097493	9930014A18Rik
1	ENSMUSG00000097503	3110045C21Rik
9	ENSMUSG00000097504	4930516B21Rik
19	ENSMUSG00000097855	A930007I19Rik
8	ENSMUSG00000098710	Mir7067
5	ENSMUSG00000098711	Gm28030
5	ENSMUSG00000098793	Gm27286
2	ENSMUSG00000098950	Gm28036
8	ENSMUSG00000100510	AV026068
1	ENSMUSG00000100954	Gm10138
1	ENSMUSG00000101661	Gm28392
14	ENSMUSG00000102189	RP23-448H3.2
18	ENSMUSG00000102918	PCDHGB6
2	ENSMUSG00000103217	RP23-132N23.22
3	ENSMUSG00000103880	RP23-389J8.3
3	ENSMUSG00000104339	RP23-380F8.2
3	ENSMUSG00000104445	Rhbg
