# Supplementary material for: Single-cell analyses of X Chromosome inactivation dynamics and pluripotency during differentiation
Source: Genome Res. 2016 Oct;26(10):1342–54. doi: 10.1101/gr.201954.115 (PMC5052059; doi:10.1101/gr.201954.115)
Supplement: Supplemental Material [file supp_gr.201954.115_Supplemental_Table_S4.xlsx]

## Sheet: table
Supplemental Table S4. Genes with enriched expression in Neuron condition
Chromosome	Ensembl gene ID	Symbol
7	ENSMUSG00000000031	H19
13	ENSMUSG00000000078	Klf6
11	ENSMUSG00000000126	Wnt9a
16	ENSMUSG00000000385	Tmprss2
11	ENSMUSG00000000538	Tom1l2
11	ENSMUSG00000000632	Sez6
11	ENSMUSG00000000690	Hoxb6
6	ENSMUSG00000000942	Hoxa4
6	ENSMUSG00000001156	Mxd1
11	ENSMUSG00000001240	Ramp2
8	ENSMUSG00000001300	Efnb2
11	ENSMUSG00000001323	Srr
11	ENSMUSG00000001507	Itga3
12	ENSMUSG00000001729	Akt1
11	ENSMUSG00000001751	Naglu
2	ENSMUSG00000002105	Slc39a13
3	ENSMUSG00000002233	Rhoc
7	ENSMUSG00000002265	Peg3
8	ENSMUSG00000002341	Ncan
1	ENSMUSG00000002459	Rgs20
10	ENSMUSG00000002578	Ikzf4
7	ENSMUSG00000002602	Axl
12	ENSMUSG00000002900	Lamb1
5	ENSMUSG00000003161	Sri
10	ENSMUSG00000003348	Mob3a
15	ENSMUSG00000003352	Cacnb3
7	ENSMUSG00000003363	Pld3
9	ENSMUSG00000003410	Elavl3
11	ENSMUSG00000003518	Dusp3
17	ENSMUSG00000003541	Ier3
10	ENSMUSG00000003746	Man1a
1	ENSMUSG00000004110	Cacna1e
6	ENSMUSG00000004267	Eno2
10	ENSMUSG00000004360	9330159F19Rik
8	ENSMUSG00000004383	Large
7	ENSMUSG00000004508	Gab2
7	ENSMUSG00000004961	Syt5
2	ENSMUSG00000005087	Cd44
13	ENSMUSG00000005320	Fgfr4
1	ENSMUSG00000005338	Cadm3
11	ENSMUSG00000005417	Mprip
X	ENSMUSG00000005696	Sh2d1a
18	ENSMUSG00000005873	Reep5
12	ENSMUSG00000006356	Crip2
8	ENSMUSG00000006362	Cbfa2t3
4	ENSMUSG00000006386	Tek
1	ENSMUSG00000006538	Ihh
4	ENSMUSG00000006586	Runx1t1
6	ENSMUSG00000006906	Stambp
11	ENSMUSG00000006931	Leprel4
17	ENSMUSG00000007021	Syngr3
17	ENSMUSG00000007038	Neu1
7	ENSMUSG00000007279	Scube2
4	ENSMUSG00000007613	Tgfbr1
7	ENSMUSG00000007783	Cpt1c
7	ENSMUSG00000007944	Ttc9b
1	ENSMUSG00000008136	Fhl2
8	ENSMUSG00000008167	Fbxw9
4	ENSMUSG00000008305	Tle1
16	ENSMUSG00000008658	Rbfox1
6	ENSMUSG00000009376	Met
6	ENSMUSG00000009394	Syn2
10	ENSMUSG00000009646	Pla2g12b
7	ENSMUSG00000010476	Ebf3
2	ENSMUSG00000010492	Uckl1os
2	ENSMUSG00000010505	Myt1
15	ENSMUSG00000010830	Kdelr3
8	ENSMUSG00000011832	Evi5l
5	ENSMUSG00000012520	Phox2b
11	ENSMUSG00000013418	B4galnt2
9	ENSMUSG00000013419	Zfp651
15	ENSMUSG00000013846	St3gal1
3	ENSMUSG00000014599	Csf1
6	ENSMUSG00000014704	Hoxa2
17	ENSMUSG00000014763	Fam120b
8	ENSMUSG00000014776	Nol3
8	ENSMUSG00000014846	Tppp3
8	ENSMUSG00000015027	Galns
7	ENSMUSG00000015133	Lrrk1
7	ENSMUSG00000015149	Sirt2
6	ENSMUSG00000015189	Casd1
1	ENSMUSG00000015222	Map2
4	ENSMUSG00000015243	Abca1
X	ENSMUSG00000015291	Gdi1
1	ENSMUSG00000015484	Fam163a
7	ENSMUSG00000015709	Arnt2
2	ENSMUSG00000016024	Lbp
5	ENSMUSG00000016128	Stard13
2	ENSMUSG00000016346	Kcnq2
15	ENSMUSG00000016763	Scube1
11	ENSMUSG00000017466	Timp2
14	ENSMUSG00000017491	Rarb
11	ENSMUSG00000017615	Tnfaip1
2	ENSMUSG00000017670	Elmo2
11	ENSMUSG00000017774	Myo1c
5	ENSMUSG00000018001	Cyth3
11	ENSMUSG00000018012	Rac3
11	ENSMUSG00000018171	Vmp1
1	ENSMUSG00000018199	Trove2
11	ENSMUSG00000018238	Gdf9
11	ENSMUSG00000018339	Gpx3
11	ENSMUSG00000018378	Cuedc1
11	ENSMUSG00000018507	Trpv2
11	ENSMUSG00000018567	Gabarap
11	ENSMUSG00000018736	Ndel1
11	ENSMUSG00000018750	Zbtb4
11	ENSMUSG00000018800	Abca5
11	ENSMUSG00000018906	P4ha2
X	ENSMUSG00000019087	Atp6ap1
6	ENSMUSG00000019124	Scrn1
15	ENSMUSG00000019146	Cacng2
7	ENSMUSG00000019194	Scn1b
11	ENSMUSG00000019461	Plscr3
3	ENSMUSG00000019528	Gyg
7	ENSMUSG00000019539	Rcn3
10	ENSMUSG00000019785	Clvs2
10	ENSMUSG00000019843	Fyn
10	ENSMUSG00000019877	Serinc1
10	ENSMUSG00000019888	Mgat4c
10	ENSMUSG00000019906	Lin7a
10	ENSMUSG00000019916	P4ha1
10	ENSMUSG00000019944	Rhobtb1
10	ENSMUSG00000019966	Kitl
10	ENSMUSG00000019986	Ahi1
10	ENSMUSG00000019998	Stx7
10	ENSMUSG00000020019	Ntn4
10	ENSMUSG00000020044	Timp3
10	ENSMUSG00000020053	Igf1
10	ENSMUSG00000020057	Dram1
10	ENSMUSG00000020077	Srgn
10	ENSMUSG00000020080	Hkdc1
10	ENSMUSG00000020098	Pcbd1
10	ENSMUSG00000020101	4632428N05Rik
10	ENSMUSG00000020102	Slc16a7
10	ENSMUSG00000020111	Micu1
10	ENSMUSG00000020121	Srgap1
10	ENSMUSG00000020123	Avpr1a
10	ENSMUSG00000020135	Apc2
10	ENSMUSG00000020150	Gamt
10	ENSMUSG00000020151	Ptprr
11	ENSMUSG00000020160	Meis1
10	ENSMUSG00000020181	Nav3
10	ENSMUSG00000020183	Cpm
10	ENSMUSG00000020205	Phlda1
10	ENSMUSG00000020230	Prmt2
10	ENSMUSG00000020231	Dip2a
10	ENSMUSG00000020246	Hcfc2
11	ENSMUSG00000020297	Nsg2
10	ENSMUSG00000020312	Shc2
11	ENSMUSG00000020366	Mapk9
11	ENSMUSG00000020374	Rasgef1c
11	ENSMUSG00000020432	Tcn2
11	ENSMUSG00000020435	Osbp2
11	ENSMUSG00000020436	Gabrg2
11	ENSMUSG00000020486	Sept4
11	ENSMUSG00000020524	Gria1
12	ENSMUSG00000020598	Nrcam
12	ENSMUSG00000020607	Fam84a
12	ENSMUSG00000020627	Klhl29
12	ENSMUSG00000020635	Fkbp1b
12	ENSMUSG00000020644	Id2
12	ENSMUSG00000020658	Efr3b
12	ENSMUSG00000020668	Kif3c
12	ENSMUSG00000020669	Sh3yl1
11	ENSMUSG00000020679	Hnf1b
11	ENSMUSG00000020684	Rasl10b
11	ENSMUSG00000020701	Tmem132e
11	ENSMUSG00000020723	Cacng4
11	ENSMUSG00000020777	Acox1
11	ENSMUSG00000020798	Spns3
11	ENSMUSG00000020859	Spag9
11	ENSMUSG00000020894	Vamp2
11	ENSMUSG00000020911	Krt19
11	ENSMUSG00000020926	Adam11
12	ENSMUSG00000020963	Tshr
12	ENSMUSG00000021010	Npas3
12	ENSMUSG00000021047	Nova1
12	ENSMUSG00000021057	Akap5
12	ENSMUSG00000021062	Rab15
12	ENSMUSG00000021065	Fut8
12	ENSMUSG00000021066	Atl1
12	ENSMUSG00000021087	Rtn1
12	ENSMUSG00000021108	Prkch
12	ENSMUSG00000021125	Arg2
12	ENSMUSG00000021133	4933426M11Rik
12	ENSMUSG00000021143	Pacs2
12	ENSMUSG00000021198	Unc79
13	ENSMUSG00000021211	Akr1c12
7	ENSMUSG00000021217	Tshz3
12	ENSMUSG00000021219	Rgs6
12	ENSMUSG00000021250	Fos
12	ENSMUSG00000021259	Cyp46a1
12	ENSMUSG00000021262	Evl
12	ENSMUSG00000021263	Degs2
12	ENSMUSG00000021268	Meg3
12	ENSMUSG00000021288	Klc1
13	ENSMUSG00000021301	Hecw1
13	ENSMUSG00000021303	Gng4
13	ENSMUSG00000021416	Eci3
13	ENSMUSG00000021453	Gadd45g
13	ENSMUSG00000021469	Msx2
13	ENSMUSG00000021477	Ctsl
13	ENSMUSG00000021506	Pitx1
13	ENSMUSG00000021591	Glrx
13	ENSMUSG00000021647	Cartpt
13	ENSMUSG00000021662	Arhgef28
13	ENSMUSG00000021668	Polk
13	ENSMUSG00000021700	Rab3c
13	ENSMUSG00000021701	Plk2
13	ENSMUSG00000021725	Parp8
14	ENSMUSG00000021770	Samd8
14	ENSMUSG00000021785	Ngly1
14	ENSMUSG00000021819	Zswim8
14	ENSMUSG00000021820	Camk2g
14	ENSMUSG00000021876	Rnase4
14	ENSMUSG00000021892	Sh3bp5
14	ENSMUSG00000021916	Glt8d1
14	ENSMUSG00000021919	Chat
14	ENSMUSG00000021959	Lats2
14	ENSMUSG00000021974	Fgf9
14	ENSMUSG00000021983	Atp8a2
14	ENSMUSG00000021987	Mtmr6
14	ENSMUSG00000022037	Clu
14	ENSMUSG00000022044	Stmn4
14	ENSMUSG00000022054	Nefm
14	ENSMUSG00000022055	Nefl
14	ENSMUSG00000022098	Bmp1
14	ENSMUSG00000022108	Itm2b
14	ENSMUSG00000022122	Ednrb
14	ENSMUSG00000022139	Mbnl2
15	ENSMUSG00000022146	Osmr
15	ENSMUSG00000022150	Dab2
14	ENSMUSG00000022208	Jph4
14	ENSMUSG00000022217	Emc9
15	ENSMUSG00000022237	Ankrd33b
15	ENSMUSG00000022270	Fam134b
15	ENSMUSG00000022305	Lrp12
15	ENSMUSG00000022438	Parvb
15	ENSMUSG00000022440	C1qtnf6
15	ENSMUSG00000022454	Nell2
15	ENSMUSG00000022456	Sept3
16	ENSMUSG00000022508	Bcl6
16	ENSMUSG00000022523	Fgf12
16	ENSMUSG00000022537	Tmem44
15	ENSMUSG00000022564	Grina
15	ENSMUSG00000022577	Ly6h
15	ENSMUSG00000022594	Lynx1
15	ENSMUSG00000022619	Mapk8ip2
15	ENSMUSG00000022629	Kif21a
16	ENSMUSG00000022636	Alcam
16	ENSMUSG00000022639	5330426P16Rik
16	ENSMUSG00000022658	Tagln3
16	ENSMUSG00000022661	Cd200
16	ENSMUSG00000022665	Ccdc80
16	ENSMUSG00000022747	St3gal6
16	ENSMUSG00000022761	Lztr1
16	ENSMUSG00000022762	Ncam2
16	ENSMUSG00000022793	B4galt4
16	ENSMUSG00000022812	Gsk3b
16	ENSMUSG00000022836	Mylk
16	ENSMUSG00000022848	Dirc2
16	ENSMUSG00000022892	App
16	ENSMUSG00000022893	Adamts1
16	ENSMUSG00000022894	Adamts5
16	ENSMUSG00000022935	Grik1
16	ENSMUSG00000022949	Clic6
16	ENSMUSG00000022951	Rcan1
16	ENSMUSG00000022952	Runx1
16	ENSMUSG00000022965	Ifngr2
16	ENSMUSG00000022969	Il10rb
16	ENSMUSG00000022973	Synj1
15	ENSMUSG00000022987	Zfp641
15	ENSMUSG00000023050	Map3k12
3	ENSMUSG00000023057	Fabp2
14	ENSMUSG00000023064	Sncg
2	ENSMUSG00000023224	Serping1
2	ENSMUSG00000023236	Scg5
5	ENSMUSG00000023328	Ache
8	ENSMUSG00000023336	Wfdc1
6	ENSMUSG00000023367	Tmem176a
15	ENSMUSG00000023484	Prph
17	ENSMUSG00000023827	Agpat4
17	ENSMUSG00000023904	Hcfc1r1
17	ENSMUSG00000023909	Paqr4
17	ENSMUSG00000023912	Slc25a27
17	ENSMUSG00000023945	Slc5a7
17	ENSMUSG00000023960	Enpp5
17	ENSMUSG00000023966	Rsph9
17	ENSMUSG00000024043	Arhgap28
17	ENSMUSG00000024063	Lbh
17	ENSMUSG00000024074	Crim1
17	ENSMUSG00000024076	Vit
17	ENSMUSG00000024083	Pja2
17	ENSMUSG00000024109	Nrxn1
17	ENSMUSG00000024112	Cacna1h
17	ENSMUSG00000024130	Abca3
17	ENSMUSG00000024193	Phf1
17	ENSMUSG00000024213	Nudt3
17	ENSMUSG00000024225	Clps
17	ENSMUSG00000024256	Adcyap1
18	ENSMUSG00000024261	Syt4
18	ENSMUSG00000024270	Slc39a6
18	ENSMUSG00000024347	Psd2
18	ENSMUSG00000024395	Lims2
17	ENSMUSG00000024403	Atp6v1g2
18	ENSMUSG00000024500	Ppp2r2b
18	ENSMUSG00000024501	Dpysl3
18	ENSMUSG00000024502	Jakmip2
18	ENSMUSG00000024503	Spink3
18	ENSMUSG00000024524	Gnal
18	ENSMUSG00000024534	Sncaip
18	ENSMUSG00000024579	Pcyox1l
18	ENSMUSG00000024647	Cbln2
19	ENSMUSG00000024663	Rab3il1
19	ENSMUSG00000024664	Fads3
19	ENSMUSG00000024727	Trpm6
19	ENSMUSG00000024738	Pga5
19	ENSMUSG00000024777	Ppp2r5b
19	ENSMUSG00000024778	Fas
19	ENSMUSG00000024781	Lipa
19	ENSMUSG00000024782	Ak3
19	ENSMUSG00000024789	Jak2
19	ENSMUSG00000024803	Ankrd1
19	ENSMUSG00000024805	Pcgf5
19	ENSMUSG00000024807	Syvn1
19	ENSMUSG00000024897	Apba1
19	ENSMUSG00000024907	Gal
19	ENSMUSG00000024935	Slc1a1
19	ENSMUSG00000024959	Bad
19	ENSMUSG00000025075	Habp2
19	ENSMUSG00000025089	Gfra1
19	ENSMUSG00000025092	Hspa12a
X	ENSMUSG00000025151	Maged1
11	ENSMUSG00000025170	Rab40b
19	ENSMUSG00000025207	Sema4g
19	ENSMUSG00000025212	Sfxn3
9	ENSMUSG00000025237	Parp6
3	ENSMUSG00000025255	Zfhx4
X	ENSMUSG00000025268	Maged2
10	ENSMUSG00000025352	Gdf11
10	ENSMUSG00000025366	Esyt1
10	ENSMUSG00000025369	Smarcc2
11	ENSMUSG00000025375	Aatk
7	ENSMUSG00000025478	Dpysl4
7	ENSMUSG00000025504	Eps8l2
7	ENSMUSG00000025510	Cd151
X	ENSMUSG00000025529	Zfp711
11	ENSMUSG00000025576	Rbfox3
11	ENSMUSG00000025578	Cbx8
6	ENSMUSG00000025608	Podxl
X	ENSMUSG00000025656	Arhgef9
17	ENSMUSG00000025738	Fbxl16
4	ENSMUSG00000025743	Sdc3
3	ENSMUSG00000025757	Hspa4l
1	ENSMUSG00000025777	Gdap1
7	ENSMUSG00000025789	St8sia2
7	ENSMUSG00000025790	Slco3a1
4	ENSMUSG00000025791	Pgm2
8	ENSMUSG00000025810	Nrp1
5	ENSMUSG00000025854	Fam20c
5	ENSMUSG00000025855	Prkar1b
18	ENSMUSG00000025885	Myo5b
6	ENSMUSG00000025889	Snca
1	ENSMUSG00000025902	Sox17
1	ENSMUSG00000025997	Ikzf2
1	ENSMUSG00000026058	Khdrbs2
1	ENSMUSG00000026080	Chst10
1	ENSMUSG00000026109	Tmeff2
1	ENSMUSG00000026113	Inpp4a
1	ENSMUSG00000026158	Ogfrl1
1	ENSMUSG00000026173	Plcd4
1	ENSMUSG00000026185	Igfbp5
1	ENSMUSG00000026188	Tmem169
1	ENSMUSG00000026203	Dnajb2
1	ENSMUSG00000026247	Ecel1
1	ENSMUSG00000026277	Stk25
1	ENSMUSG00000026360	Rgs2
1	ENSMUSG00000026426	Arl8a
1	ENSMUSG00000026527	Rgs7
1	ENSMUSG00000026587	Astn1
1	ENSMUSG00000026627	Tmem206
2	ENSMUSG00000026726	Cubn
2	ENSMUSG00000026728	Vim
2	ENSMUSG00000026764	Kif5c
2	ENSMUSG00000026781	Acbd5
2	ENSMUSG00000026797	Stxbp1
2	ENSMUSG00000026821	Ralgds
2	ENSMUSG00000026825	Dnm1
2	ENSMUSG00000026879	Gsn
2	ENSMUSG00000026888	Grb14
2	ENSMUSG00000026932	Nacc2
2	ENSMUSG00000026959	Grin1
2	ENSMUSG00000026971	Itgb6
2	ENSMUSG00000027035	Cers6
2	ENSMUSG00000027200	Sema6d
2	ENSMUSG00000027219	Slc28a2
2	ENSMUSG00000027230	Creb3l1
2	ENSMUSG00000027249	F2
2	ENSMUSG00000027273	Snap25
2	ENSMUSG00000027303	Ptpra
2	ENSMUSG00000027309	4930402H24Rik
2	ENSMUSG00000027312	Atrn
2	ENSMUSG00000027350	Chgb
2	ENSMUSG00000027419	Pcsk2
3	ENSMUSG00000027499	Pkia
3	ENSMUSG00000027508	Pag1
2	ENSMUSG00000027525	Phactr3
2	ENSMUSG00000027577	Chrna4
2	ENSMUSG00000027583	Zbtb46
2	ENSMUSG00000027584	Oprl1
2	ENSMUSG00000027602	Map1lc3a
2	ENSMUSG00000027603	Ggt7
2	ENSMUSG00000027605	Acss2
2	ENSMUSG00000027611	Procr
2	ENSMUSG00000027612	Mmp24
3	ENSMUSG00000027669	Gnb4
3	ENSMUSG00000027692	Tnik
3	ENSMUSG00000027695	Pld1
3	ENSMUSG00000027712	Anxa5
3	ENSMUSG00000027739	Rab33b
3	ENSMUSG00000027784	Ppm1l
3	ENSMUSG00000027800	Tm4sf1
3	ENSMUSG00000027805	Pfn2
3	ENSMUSG00000027827	Kcnab1
3	ENSMUSG00000027834	Serpini1
3	ENSMUSG00000027848	Olfml3
3	ENSMUSG00000027849	Syt6
3	ENSMUSG00000027858	Tspan2
3	ENSMUSG00000027894	Slc6a17
3	ENSMUSG00000027950	Chrnb2
3	ENSMUSG00000027978	Prss12
3	ENSMUSG00000028024	Enpep
1	ENSMUSG00000028033	Kcnq5
3	ENSMUSG00000028057	Rit1
3	ENSMUSG00000028128	F3
3	ENSMUSG00000028137	Celf3
3	ENSMUSG00000028194	Ddah1
3	ENSMUSG00000028195	Cyr61
4	ENSMUSG00000028226	Mmp16
4	ENSMUSG00000028229	Rmdn1
4	ENSMUSG00000028337	Coro2a
4	ENSMUSG00000028341	Nr4a3
3	ENSMUSG00000028360	Slc44a5
4	ENSMUSG00000028364	Tnc
4	ENSMUSG00000028383	Hsdl2
4	ENSMUSG00000028399	Ptprd
4	ENSMUSG00000028439	Fam219a
4	ENSMUSG00000028456	Unc13b
4	ENSMUSG00000028466	Creb3
4	ENSMUSG00000028469	Npr2
4	ENSMUSG00000028497	Ptplad2
4	ENSMUSG00000028518	Prkaa2
4	ENSMUSG00000028524	Sgip1
4	ENSMUSG00000028530	Jak1
4	ENSMUSG00000028545	Bend5
4	ENSMUSG00000028546	Elavl4
4	ENSMUSG00000028565	Nfia
4	ENSMUSG00000028584	Lrrc38
4	ENSMUSG00000028664	Ephb2
4	ENSMUSG00000028756	Pink1
4	ENSMUSG00000028759	Hp1bp3
4	ENSMUSG00000028776	Tinagl1
4	ENSMUSG00000028778	Hcrtr1
5	ENSMUSG00000028780	Sema3c
4	ENSMUSG00000028785	Hpca
4	ENSMUSG00000028804	Csmd2
4	ENSMUSG00000028830	AU040320
5	ENSMUSG00000028883	Sema3a
4	ENSMUSG00000029001	Fbxo44
5	ENSMUSG00000029088	Kcnip4
5	ENSMUSG00000029094	Afap1
5	ENSMUSG00000029121	Crmp1
5	ENSMUSG00000029123	Stk32b
5	ENSMUSG00000029126	Nsg1
5	ENSMUSG00000029135	Fosl2
5	ENSMUSG00000029161	Cgref1
5	ENSMUSG00000029166	Mapre3
5	ENSMUSG00000029185	Fam114a1
5	ENSMUSG00000029189	Sel1l3
5	ENSMUSG00000029219	Slc10a4
5	ENSMUSG00000029245	Epha5
5	ENSMUSG00000029260	Ugt2b34
5	ENSMUSG00000029291	Rufy3
5	ENSMUSG00000029321	Slc10a6
5	ENSMUSG00000029333	Rasgef1b
5	ENSMUSG00000029406	Pitpnm2
5	ENSMUSG00000029408	Abcb9
5	ENSMUSG00000029484	Anxa3
6	ENSMUSG00000029534	St7
6	ENSMUSG00000029553	Tfec
5	ENSMUSG00000029616	Erp29
5	ENSMUSG00000029712	Actl6b
5	ENSMUSG00000029713	Gnb2
5	ENSMUSG00000029729	Zkscan1
6	ENSMUSG00000029810	Tmem176b
6	ENSMUSG00000029838	Ptn
15	ENSMUSG00000029875	Ccdc184
12	ENSMUSG00000029878	Dbpht2
6	ENSMUSG00000029998	Pcyox1
6	ENSMUSG00000030000	Add2
6	ENSMUSG00000030049	Gkn2
6	ENSMUSG00000030050	Gkn1
6	ENSMUSG00000030077	Chl1
6	ENSMUSG00000030110	Ret
6	ENSMUSG00000030207	8430419L09Rik
6	ENSMUSG00000030209	Grin2b
6	ENSMUSG00000030223	Ptpro
6	ENSMUSG00000030256	Bhlhe41
6	ENSMUSG00000030257	Srgap3
6	ENSMUSG00000030272	Camk1
6	ENSMUSG00000030283	St8sia1
6	ENSMUSG00000030302	Atp2b2
7	ENSMUSG00000030401	Rtn2
7	ENSMUSG00000030411	Nova2
8	ENSMUSG00000030465	Psd3
7	ENSMUSG00000030519	Apba2
7	ENSMUSG00000030551	Nr2f2
7	ENSMUSG00000030554	Synm
7	ENSMUSG00000030587	2200002D01Rik
7	ENSMUSG00000030643	Rab30
7	ENSMUSG00000030683	Sez6l2
7	ENSMUSG00000030762	Aqp8
7	ENSMUSG00000030770	Parva
7	ENSMUSG00000030782	Tgfb1i1
7	ENSMUSG00000030806	Stx1b
7	ENSMUSG00000030854	Ptpn5
7	ENSMUSG00000030878	Cdr2
7	ENSMUSG00000030930	Chst15
7	ENSMUSG00000030987	Stim1
7	ENSMUSG00000031021	Tmem9b
X	ENSMUSG00000031104	Rab33a
X	ENSMUSG00000031137	Fgf13
X	ENSMUSG00000031144	Syp
X	ENSMUSG00000031156	Slc35a2
X	ENSMUSG00000031176	Dynlt3
X	ENSMUSG00000031216	Stard8
X	ENSMUSG00000031227	Magee1
X	ENSMUSG00000031284	Pak3
X	ENSMUSG00000031285	Dcx
X	ENSMUSG00000031342	Gpm6b
X	ENSMUSG00000031355	Arhgap6
X	ENSMUSG00000031358	Msl3
X	ENSMUSG00000031391	L1cam
X	ENSMUSG00000031398	Plxna3
X	ENSMUSG00000031410	Nxf7
X	ENSMUSG00000031428	Zcchc18
X	ENSMUSG00000031434	Morc4
8	ENSMUSG00000031483	Erlin2
8	ENSMUSG00000031502	Col4a1
8	ENSMUSG00000031503	Col4a2
8	ENSMUSG00000031517	Gpm6a
8	ENSMUSG00000031538	Plat
8	ENSMUSG00000031539	Ap3m2
8	ENSMUSG00000031570	Ppapdc1b
8	ENSMUSG00000031621	Isx
8	ENSMUSG00000031626	Sorbs2
8	ENSMUSG00000031627	Irf2
8	ENSMUSG00000031709	Tbc1d9
8	ENSMUSG00000031748	Gnao1
8	ENSMUSG00000031780	Ccl17
8	ENSMUSG00000031790	Mmp15
8	ENSMUSG00000031791	Tmem38a
8	ENSMUSG00000031824	6430548M08Rik
8	ENSMUSG00000031827	Cotl1
8	ENSMUSG00000031840	Rab3a
8	ENSMUSG00000031841	Cdh13
8	ENSMUSG00000031861	Lpar2
8	ENSMUSG00000031871	Cdh5
8	ENSMUSG00000031872	Bean1
8	ENSMUSG00000031875	Cmtm3
8	ENSMUSG00000031906	Smpd3
8	ENSMUSG00000031970	Dbndd1
9	ENSMUSG00000032006	Pdgfd
9	ENSMUSG00000032009	Sesn3
9	ENSMUSG00000032020	Ubash3b
9	ENSMUSG00000032047	Acat1
9	ENSMUSG00000032060	Cryab
9	ENSMUSG00000032085	Tagln
9	ENSMUSG00000032105	Pdzd3
9	ENSMUSG00000032118	Fez1
9	ENSMUSG00000032121	Tmem218
9	ENSMUSG00000032172	Olfm2
9	ENSMUSG00000032181	Scg3
9	ENSMUSG00000032186	Tmod2
9	ENSMUSG00000032192	Gnb5
9	ENSMUSG00000032231	Anxa2
9	ENSMUSG00000032265	Fam46a
9	ENSMUSG00000032297	Celf6
9	ENSMUSG00000032303	Chrna3
9	ENSMUSG00000032327	Stra6
9	ENSMUSG00000032328	Tmem30a
9	ENSMUSG00000032332	Col12a1
9	ENSMUSG00000032353	Tmed3
9	ENSMUSG00000032359	Ctsh
9	ENSMUSG00000032372	Plscr2
9	ENSMUSG00000032374	Plod2
9	ENSMUSG00000032375	Aph1b
9	ENSMUSG00000032440	Tgfbr2
9	ENSMUSG00000032452	Clstn2
9	ENSMUSG00000032491	Nradd
9	ENSMUSG00000032492	Pth1r
9	ENSMUSG00000032502	Stac
9	ENSMUSG00000032507	Fbxl2
9	ENSMUSG00000032537	Ephb1
9	ENSMUSG00000032549	Rab6b
9	ENSMUSG00000032578	Cish
6	ENSMUSG00000032625	Thsd7a
18	ENSMUSG00000032735	Ablim3
17	ENSMUSG00000032796	Lama1
1	ENSMUSG00000033061	Resp18
6	ENSMUSG00000033152	Podxl2
17	ENSMUSG00000033200	Tpsg1
14	ENSMUSG00000033214	Slitrk5
5	ENSMUSG00000033316	Galnt9
11	ENSMUSG00000033352	Map2k4
9	ENSMUSG00000033392	Clasp2
9	ENSMUSG00000033419	Snap91
1	ENSMUSG00000033569	Bai3
9	ENSMUSG00000033577	Myo6
X	ENSMUSG00000033578	Tmem35
5	ENSMUSG00000033615	Cplx1
1	ENSMUSG00000033671	Cep350
7	ENSMUSG00000033676	Gabrb3
1	ENSMUSG00000033684	Qsox1
19	ENSMUSG00000033768	Nrxn2
12	ENSMUSG00000033854	Kcnk10
17	ENSMUSG00000033855	Ston1
11	ENSMUSG00000033880	Lgals3bp
18	ENSMUSG00000033960	9430020K01Rik
3	ENSMUSG00000033981	Gria2
5	ENSMUSG00000034040	Wbscr17
3	ENSMUSG00000034098	Fstl5
5	ENSMUSG00000034110	Kctd7
10	ENSMUSG00000034127	Tspan8
8	ENSMUSG00000034189	Hsdl1
14	ENSMUSG00000034205	Loxl2
17	ENSMUSG00000034265	Zdhhc14
18	ENSMUSG00000034295	Fhod3
13	ENSMUSG00000034488	Edil3
11	ENSMUSG00000034586	Hid1
10	ENSMUSG00000034591	Slc41a2
10	ENSMUSG00000034612	Chst11
5	ENSMUSG00000034663	Bmp2k
2	ENSMUSG00000034683	Ppp1r1c
10	ENSMUSG00000034707	Gns
2	ENSMUSG00000034738	Nostrin
6	ENSMUSG00000034744	Nagk
X	ENSMUSG00000034755	Pcdh11x
2	ENSMUSG00000034780	B3galt1
10	ENSMUSG00000034813	Grip1
10	ENSMUSG00000034818	Celf5
2	ENSMUSG00000034850	Tmem127
9	ENSMUSG00000034858	Fam214a
2	ENSMUSG00000034903	Cobll1
9	ENSMUSG00000034910	Pygo1
12	ENSMUSG00000034912	Mdga2
10	ENSMUSG00000034958	Atcay
5	ENSMUSG00000034981	Parm1
6	ENSMUSG00000035104	Eva1a
11	ENSMUSG00000035112	Wnk4
1	ENSMUSG00000035131	Brinp3
14	ENSMUSG00000035184	Fam124a
5	ENSMUSG00000035187	Nkx6-1
10	ENSMUSG00000035189	Ano4
6	ENSMUSG00000035199	Arl6ip5
7	ENSMUSG00000035314	Gdpd5
11	ENSMUSG00000035441	Myo1d
4	ENSMUSG00000035517	Tdrd7
14	ENSMUSG00000035566	Pcdh17
4	ENSMUSG00000035615	Frmpd1
10	ENSMUSG00000035640	Dos
12	ENSMUSG00000035653	Lrfn5
X	ENSMUSG00000035776	Cd99l2
19	ENSMUSG00000035783	Acta2
10	ENSMUSG00000035835	Lppr3
X	ENSMUSG00000035847	Ids
10	ENSMUSG00000035864	Syt1
2	ENSMUSG00000035877	Zhx3
17	ENSMUSG00000036026	Tmem63b
4	ENSMUSG00000036052	Dnajb5
4	ENSMUSG00000036062	N28178
2	ENSMUSG00000036186	Fam69b
X	ENSMUSG00000036198	Arhgap36
14	ENSMUSG00000036242	3632451O06Rik
11	ENSMUSG00000036275	9530068E07Rik
12	ENSMUSG00000036295	Lrrn3
12	ENSMUSG00000036333	Kidins220
8	ENSMUSG00000036356	Csgalnact1
9	ENSMUSG00000036466	Megf11
8	ENSMUSG00000036469	March1
10	ENSMUSG00000036478	Btg1
8	ENSMUSG00000036564	Ndrg4
7	ENSMUSG00000036578	Fxyd7
5	ENSMUSG00000036599	Chst12
11	ENSMUSG00000036620	Mgat4b
4	ENSMUSG00000036622	Atp13a2
6	ENSMUSG00000036667	Fam115a
1	ENSMUSG00000036766	Dner
1	ENSMUSG00000036815	Dpp10
3	ENSMUSG00000036832	Lpar3
4	ENSMUSG00000036856	Wnt4
7	ENSMUSG00000036862	Dchs1
7	ENSMUSG00000036882	Arhgap33
8	ENSMUSG00000036913	Trim67
7	ENSMUSG00000036957	Lrfn3
X	ENSMUSG00000036985	Zdhhc9
7	ENSMUSG00000036989	Trim3
2	ENSMUSG00000037025	Foxa2
7	ENSMUSG00000037032	Apbb1
19	ENSMUSG00000037126	Psd
17	ENSMUSG00000037196	Pacrg
X	ENSMUSG00000037217	Syn1
8	ENSMUSG00000037234	Hook3
5	ENSMUSG00000037235	Mxd4
7	ENSMUSG00000037239	Spred3
2	ENSMUSG00000037259	Dzank1
1	ENSMUSG00000037318	Traf3ip3
17	ENSMUSG00000037321	Tap1
10	ENSMUSG00000037370	Enpp1
5	ENSMUSG00000037379	Spon2
9	ENSMUSG00000037419	Endod1
5	ENSMUSG00000037428	Vgf
10	ENSMUSG00000037440	Vnn1
5	ENSMUSG00000037605	Lphn3
7	ENSMUSG00000037606	Osbpl5
17	ENSMUSG00000037649	H2-DMa
5	ENSMUSG00000037653	Kctd8
7	ENSMUSG00000037664	Cdkn1c
12	ENSMUSG00000037735	2810032G03Rik
5	ENSMUSG00000037736	Limch1
10	ENSMUSG00000037747	Phyhipl
2	ENSMUSG00000037754	Ppp1r16b
6	ENSMUSG00000037788	Vopp1
5	ENSMUSG00000037822	Smim14
8	ENSMUSG00000037852	Cpe
1	ENSMUSG00000037872	Ackr1
7	ENSMUSG00000037887	Dusp8
13	ENSMUSG00000037933	Bicd2
9	ENSMUSG00000037949	Ano10
13	ENSMUSG00000037960	1110007C09Rik
13	ENSMUSG00000037989	Wnk2
9	ENSMUSG00000038086	Hspb2
9	ENSMUSG00000038112	AW551984
9	ENSMUSG00000038145	Snrk
13	ENSMUSG00000038152	5033430I15Rik
3	ENSMUSG00000038170	Pde4dip
7	ENSMUSG00000038244	Mical2
10	ENSMUSG00000038248	Sobp
6	ENSMUSG00000038253	Hoxa5
8	ENSMUSG00000038291	Snx25
1	ENSMUSG00000038305	Spats2l
1	ENSMUSG00000038349	Plcl1
2	ENSMUSG00000038375	Trp53inp2
13	ENSMUSG00000038415	Foxq1
11	ENSMUSG00000038453	Srcin1
3	ENSMUSG00000038486	Sv2a
1	ENSMUSG00000038530	Rgs4
10	ENSMUSG00000038602	Slc35f1
8	ENSMUSG00000038604	Fam65a
10	ENSMUSG00000038624	Nepn
11	ENSMUSG00000038692	Hoxb4
11	ENSMUSG00000038700	Hoxb5
11	ENSMUSG00000038721	Hoxb7
2	ENSMUSG00000038751	Ptk6
8	ENSMUSG00000038872	Zfhx3
10	ENSMUSG00000038916	Soga3
2	ENSMUSG00000038990	Cables2
3	ENSMUSG00000039037	St6galnac5
7	ENSMUSG00000039043	2610034B18Rik
14	ENSMUSG00000039081	Zfp503
3	ENSMUSG00000039103	Nexn
17	ENSMUSG00000039154	Shd
6	ENSMUSG00000039159	Ube2h
4	ENSMUSG00000039196	Orm1
3	ENSMUSG00000039234	Sec24d
1	ENSMUSG00000039239	Tgfb2
4	ENSMUSG00000039270	Megf9
6	ENSMUSG00000039347	Atp6v0e2
1	ENSMUSG00000039372	March4
15	ENSMUSG00000039385	Cdh6
7	ENSMUSG00000039405	Prss23
6	ENSMUSG00000039419	Cntnap2
9	ENSMUSG00000039461	Tcta
8	ENSMUSG00000039478	Micu3
X	ENSMUSG00000039556	Ppp1r3f
17	ENSMUSG00000039601	Rcan2
9	ENSMUSG00000039607	Rbms3
8	ENSMUSG00000039661	Dusp26
5	ENSMUSG00000039683	Sdk1
3	ENSMUSG00000039717	Ralyl
4	ENSMUSG00000039740	Alg2
17	ENSMUSG00000039770	Ypel5
5	ENSMUSG00000039782	Cpeb2
5	ENSMUSG00000039860	Srrm3
10	ENSMUSG00000039879	Heca
10	ENSMUSG00000039910	Cited2
4	ENSMUSG00000039911	Spsb1
2	ENSMUSG00000039913	Pak7
18	ENSMUSG00000039954	Stk32a
8	ENSMUSG00000039960	Rhou
19	ENSMUSG00000039982	Dtx4
11	ENSMUSG00000039989	Cbx4
10	ENSMUSG00000040009	Gnaz
2	ENSMUSG00000040035	Disp2
3	ENSMUSG00000040037	Negr1
19	ENSMUSG00000040105	Ppapdc2
5	ENSMUSG00000040118	Cacna2d1
2	ENSMUSG00000040152	Thbs1
11	ENSMUSG00000040158	Tax1bp3
1	ENSMUSG00000040181	Fmo1
5	ENSMUSG00000040254	Sema3d
1	ENSMUSG00000040265	Dnm3
3	ENSMUSG00000040322	Slc25a24
3	ENSMUSG00000040339	Fam102b
11	ENSMUSG00000040373	Cacng5
7	ENSMUSG00000040390	Map3k10
4	ENSMUSG00000040410	Fbxl4
15	ENSMUSG00000040420	Cdh18
11	ENSMUSG00000040447	Spns2
10	ENSMUSG00000040462	Os9
1	ENSMUSG00000040596	Pogk
16	ENSMUSG00000040605	Bace2
8	ENSMUSG00000040631	Dok4
11	ENSMUSG00000040711	Sh3pxd2b
6	ENSMUSG00000040797	Iqsec3
X	ENSMUSG00000040808	S100g
17	ENSMUSG00000040852	Plekhh2
4	ENSMUSG00000040972	Igsf21
X	ENSMUSG00000040990	Sh3kbp1
3	ENSMUSG00000040998	Npnt
9	ENSMUSG00000041012	Cmtm8
11	ENSMUSG00000041073	Nacad
4	ENSMUSG00000041120	Nbl1
7	ENSMUSG00000041141	Pnmal1
4	ENSMUSG00000041216	Clvs1
3	ENSMUSG00000041263	Rusc1
4	ENSMUSG00000041272	Tox
19	ENSMUSG00000041362	4930506M07Rik
13	ENSMUSG00000041417	Pik3r1
6	ENSMUSG00000041540	Sox5
1	ENSMUSG00000041570	Camsap2
7	ENSMUSG00000041571	Sepw1
11	ENSMUSG00000041592	Sdk2
14	ENSMUSG00000041594	Tmtc4
12	ENSMUSG00000041669	Prima1
14	ENSMUSG00000041730	Prrxl1
1	ENSMUSG00000041757	Plekha6
3	ENSMUSG00000041842	Fhdc1
1	ENSMUSG00000041889	Shisa4
11	ENSMUSG00000041895	Wipi1
4	ENSMUSG00000041954	Tnfrsf18
5	ENSMUSG00000042078	Svop
7	ENSMUSG00000042105	Inpp5f
15	ENSMUSG00000042109	Csdc2
14	ENSMUSG00000042156	Dzip1
4	ENSMUSG00000042228	Lyn
13	ENSMUSG00000042258	Isl1
2	ENSMUSG00000042359	Osbpl6
19	ENSMUSG00000042401	Crtac1
1	ENSMUSG00000042429	Adora1
9	ENSMUSG00000042444	Fam63b
19	ENSMUSG00000042532	Golga7b
2	ENSMUSG00000042662	Dusp15
12	ENSMUSG00000042724	Map3k9
5	ENSMUSG00000042726	Trafd1
5	ENSMUSG00000042744	Gm15800
3	ENSMUSG00000042766	Trim46
18	ENSMUSG00000042834	Nrep
13	ENSMUSG00000042842	Serpinb6b
10	ENSMUSG00000042846	Lrrtm3
13	ENSMUSG00000042857	Gm9776
7	ENSMUSG00000042978	Sbk1
9	ENSMUSG00000043013	Onecut1
9	ENSMUSG00000043154	Ppp2r3a
3	ENSMUSG00000043300	B3galnt1
16	ENSMUSG00000043336	Filip1l
5	ENSMUSG00000043388	Tmem130
X	ENSMUSG00000043463	Rab9b
15	ENSMUSG00000043501	Lgals2
X	ENSMUSG00000043518	Rai2
10	ENSMUSG00000043670	Diras1
10	ENSMUSG00000043822	Adamtsl5
9	ENSMUSG00000043885	Slc36a4
18	ENSMUSG00000044024	Rell2
5	ENSMUSG00000044060	A830010M20Rik
10	ENSMUSG00000044071	Fam19a2
5	ENSMUSG00000044197	Gpr146
3	ENSMUSG00000044365	Cxxc4
3	ENSMUSG00000044468	Fam46c
3	ENSMUSG00000044528	Tram1l1
18	ENSMUSG00000044646	Zbtb7c
12	ENSMUSG00000044912	Syt16
17	ENSMUSG00000045038	Prkce
1	ENSMUSG00000045174	Amer3
14	ENSMUSG00000045211	Nudt18
5	ENSMUSG00000045348	Nyap1
3	ENSMUSG00000045539	Sprr3
11	ENSMUSG00000045545	Krt14
6	ENSMUSG00000045613	Chrm2
19	ENSMUSG00000045664	Cdc42ep2
15	ENSMUSG00000045763	Basp1
18	ENSMUSG00000045991	Onecut2
19	ENSMUSG00000046008	Pnlip
18	ENSMUSG00000046191	Pcdhb20
7	ENSMUSG00000046223	Plaur
X	ENSMUSG00000046269	Usp27x
18	ENSMUSG00000046387	Pcdhb17
1	ENSMUSG00000046404	Yod1
4	ENSMUSG00000046447	Camk2n1
8	ENSMUSG00000046556	Zfp319
16	ENSMUSG00000046613	Vwa5b2
5	ENSMUSG00000046709	Mapk10
18	ENSMUSG00000046727	Cystm1
3	ENSMUSG00000046743	Fat4
10	ENSMUSG00000046807	Lrrc75b
10	ENSMUSG00000046841	Ckap4
8	ENSMUSG00000046844	Vat1l
13	ENSMUSG00000046876	Atxn1
18	ENSMUSG00000046982	Tshz1
7	ENSMUSG00000047037	Nipa1
7	ENSMUSG00000047085	Lrrc4b
11	ENSMUSG00000047181	Samd14
X	ENSMUSG00000047242	Taf9b
16	ENSMUSG00000047261	Gap43
19	ENSMUSG00000047379	B3gnt1
9	ENSMUSG00000047409	Ctdspl
12	ENSMUSG00000047414	Flrt2
3	ENSMUSG00000047557	Lxn
2	ENSMUSG00000047617	BC029214
10	ENSMUSG00000047712	Ust
15	ENSMUSG00000047728	BC025446
2	ENSMUSG00000047907	Tshz2
18	ENSMUSG00000047910	Pcdhb16
1	ENSMUSG00000048096	Lmod1
7	ENSMUSG00000048200	Cracr2b
6	ENSMUSG00000048216	Gpr85
3	ENSMUSG00000048455	Sprr1b
9	ENSMUSG00000048503	Tmem136
3	ENSMUSG00000048540	Nhlh2
7	ENSMUSG00000048583	Igf2
19	ENSMUSG00000048612	Myof
11	ENSMUSG00000048763	Hoxb3
4	ENSMUSG00000048772	Tmem53
11	ENSMUSG00000048807	Slc35e4
11	ENSMUSG00000048895	Cdk5r1
2	ENSMUSG00000048911	Rnf24
7	ENSMUSG00000048965	Mrgpre
5	ENSMUSG00000048988	Elfn1
2	ENSMUSG00000049044	Rapgef4
3	ENSMUSG00000049100	Pcdh10
4	ENSMUSG00000049122	Frmd3
15	ENSMUSG00000049148	Plcxd3
X	ENSMUSG00000049191	Rgag4
4	ENSMUSG00000049225	Pdp1
2	ENSMUSG00000049252	Lrp1b
9	ENSMUSG00000049281	Scn3b
11	ENSMUSG00000049354	Dcaf7
9	ENSMUSG00000049556	Lingo1
X	ENSMUSG00000049775	Tmsb4x
11	ENSMUSG00000049807	Arhgap23
10	ENSMUSG00000049858	Suox
1	ENSMUSG00000049866	Arl4c
11	ENSMUSG00000050132	Sarm1
7	ENSMUSG00000050440	Hamp
2	ENSMUSG00000050530	Fam171a1
2	ENSMUSG00000050587	Lrrc4c
5	ENSMUSG00000050640	Tmem150c
1	ENSMUSG00000050711	Scg2
16	ENSMUSG00000050761	Gp1bb
16	ENSMUSG00000050821	Fam131a
5	ENSMUSG00000050822	Slc29a4
18	ENSMUSG00000050875	A730017C20Rik
16	ENSMUSG00000050908	Tvp23a
1	ENSMUSG00000050967	Creg2
5	ENSMUSG00000051022	Hs3st1
7	ENSMUSG00000051048	P4ha3
2	ENSMUSG00000051154	Commd3
X	ENSMUSG00000051159	Cited1
2	ENSMUSG00000051177	Plcb1
4	ENSMUSG00000051351	Zfp46
15	ENSMUSG00000051359	Ncald
18	ENSMUSG00000051401	Kctd16
7	ENSMUSG00000051550	Zfp579
14	ENSMUSG00000051615	Rap2a
10	ENSMUSG00000051652	Lrrc3
1	ENSMUSG00000051703	Tmem198
1	ENSMUSG00000051951	Xkr4
10	ENSMUSG00000052302	Tbc1d30
7	ENSMUSG00000052353	Cemip
X	ENSMUSG00000052364	B630019K06Rik
11	ENSMUSG00000052373	Mpp3
16	ENSMUSG00000052516	Robo2
10	ENSMUSG00000052613	Pcdh15
4	ENSMUSG00000052684	Jun
13	ENSMUSG00000052727	Map1b
6	ENSMUSG00000052852	Reep1
X	ENSMUSG00000052854	Nrk
19	ENSMUSG00000052920	Prkg1
18	ENSMUSG00000052928	Ctif
11	ENSMUSG00000052949	Rnf157
7	ENSMUSG00000053046	Brsk2
2	ENSMUSG00000053166	Cdh22
3	ENSMUSG00000053192	Mllt11
19	ENSMUSG00000053279	Aldh1a1
11	ENSMUSG00000053519	Kcnip1
7	ENSMUSG00000053550	Shisa7
11	ENSMUSG00000053580	Tanc2
3	ENSMUSG00000053819	Camk2d
10	ENSMUSG00000053825	Ppfia2
8	ENSMUSG00000053886	Sh2d4a
18	ENSMUSG00000054008	Ndst1
12	ENSMUSG00000054013	Tmem179
8	ENSMUSG00000054162	Spock3
15	ENSMUSG00000054263	Lifr
12	ENSMUSG00000054364	Rhob
15	ENSMUSG00000054409	Tmem74
14	ENSMUSG00000054423	Cadps
7	ENSMUSG00000054555	Adam12
7	ENSMUSG00000054676	1600014C10Rik
4	ENSMUSG00000054679	Srsf12
9	ENSMUSG00000054693	Adam10
5	ENSMUSG00000054720	Lrrc8c
13	ENSMUSG00000054728	Phactr1
9	ENSMUSG00000054792	Klhl18
19	ENSMUSG00000054843	Atrnl1
5	ENSMUSG00000054920	Klhl5
1	ENSMUSG00000054976	Nyap2
15	ENSMUSG00000055022	Cntn1
15	ENSMUSG00000055114	Anxa13
1	ENSMUSG00000055214	Pld5
13	ENSMUSG00000055254	Ntrk2
6	ENSMUSG00000055430	Nap1l5
16	ENSMUSG00000055447	Cd47
8	ENSMUSG00000055707	Klhl26
15	ENSMUSG00000055745	Ldoc1l
4	ENSMUSG00000055761	Nkain3
10	ENSMUSG00000055862	Izumo4
3	ENSMUSG00000056071	S100a9
10	ENSMUSG00000056073	Grik2
6	ENSMUSG00000056091	St3gal5
17	ENSMUSG00000056121	Fez2
11	ENSMUSG00000056158	Car10
19	ENSMUSG00000056185	Snx32
18	ENSMUSG00000056214	Pard6g
13	ENSMUSG00000056222	Spock1
16	ENSMUSG00000056423	Uts2b
6	ENSMUSG00000056445	Hoxaas2
12	ENSMUSG00000056553	Ptprn2
X	ENSMUSG00000056679	Gpr173
6	ENSMUSG00000056755	Grm7
18	ENSMUSG00000056812	St8sia3
10	ENSMUSG00000056888	Glipr1
11	ENSMUSG00000056895	Hist3h2ba
7	ENSMUSG00000057092	Fxyd3
6	ENSMUSG00000057137	Tmem140
6	ENSMUSG00000057230	Aak1
1	ENSMUSG00000057335	Cep170
6	ENSMUSG00000057716	Tmem178b
18	ENSMUSG00000057766	Ankrd29
3	ENSMUSG00000057777	Mab21l2
16	ENSMUSG00000057880	Abat
11	ENSMUSG00000057967	Fgf18
1	ENSMUSG00000058248	Kcnh1
10	ENSMUSG00000058297	Spock2
7	ENSMUSG00000058420	Syt17
13	ENSMUSG00000058569	Tmed9
10	ENSMUSG00000058589	Anks1b
13	ENSMUSG00000058672	Tubb2a
14	ENSMUSG00000058690	Ccser2
7	ENSMUSG00000058966	Fam57b
2	ENSMUSG00000059013	Sh2d3c
X	ENSMUSG00000059401	Mamld1
6	ENSMUSG00000059430	Actg2
10	ENSMUSG00000059602	Syn3
17	ENSMUSG00000059714	Flot1
9	ENSMUSG00000059741	Myl3
3	ENSMUSG00000059921	Unc5c
5	ENSMUSG00000060204	Gm5868
7	ENSMUSG00000060240	Cend1
1	ENSMUSG00000060424	Pantr1
18	ENSMUSG00000060450	Rnf14
1	ENSMUSG00000060568	Fam78b
4	ENSMUSG00000060572	Mfap2
X	ENSMUSG00000060681	Slc9a6
6	ENSMUSG00000060780	Lrrtm1
2	ENSMUSG00000060802	B2m
10	ENSMUSG00000060935	Tmem263
16	ENSMUSG00000061080	Lsamp
5	ENSMUSG00000061601	Pclo
12	ENSMUSG00000061603	Akap6
GL456233.1	ENSMUSG00000061654	Spry3
11	ENSMUSG00000061666	Gdpd1
15	ENSMUSG00000061731	Ext1
18	ENSMUSG00000061808	Ttr
12	ENSMUSG00000061911	Myt1l
12	ENSMUSG00000061947	Serpina10
11	ENSMUSG00000061981	Flot2
5	ENSMUSG00000062234	Gak
8	ENSMUSG00000062380	Tubb3
15	ENSMUSG00000062760	1810041L15Rik
12	ENSMUSG00000062929	Cfl2
8	ENSMUSG00000062991	Nrg1
14	ENSMUSG00000063060	Sox7
6	ENSMUSG00000063063	Ctnna2
14	ENSMUSG00000063142	Kcnma1
5	ENSMUSG00000063146	Clip2
7	ENSMUSG00000063297	Luzp2
19	ENSMUSG00000063434	Sorcs3
4	ENSMUSG00000063446	Lppr1
6	ENSMUSG00000063568	Jazf1
7	ENSMUSG00000063651	Cnfn
3	ENSMUSG00000063887	Nlgn1
8	ENSMUSG00000064125	BC068157
15	ENSMUSG00000064210	Ano6
6	ENSMUSG00000064293	Cntn4
11	ENSMUSG00000065529	Mir22
9	ENSMUSG00000066235	Pomgnt2
12	ENSMUSG00000066392	Nrxn3
9	ENSMUSG00000066477	Gm16551
1	ENSMUSG00000066800	Rnasel
X	ENSMUSG00000067276	Capn6
1	ENSMUSG00000067336	Bmpr2
2	ENSMUSG00000067786	Nnat
2	ENSMUSG00000067818	Myl9
19	ENSMUSG00000067889	Sptbn2
6	ENSMUSG00000068011	Mkrn2os
16	ENSMUSG00000068196	Col8a1
3	ENSMUSG00000068740	Celsr2
6	ENSMUSG00000068748	Ptprz1
3	ENSMUSG00000068923	Syt11
3	ENSMUSG00000069072	Slc7a14
13	ENSMUSG00000069171	Nr2f1
13	ENSMUSG00000069227	Gprin1
10	ENSMUSG00000069601	Ank3
11	ENSMUSG00000069808	Fam57a
7	ENSMUSG00000070604	Vsig10l
5	ENSMUSG00000070858	Gm1673
2	ENSMUSG00000070866	Zfp804a
4	ENSMUSG00000071001	Hrct1
12	ENSMUSG00000071265	1700086L19Rik
12	ENSMUSG00000071379	Hpcal1
15	ENSMUSG00000071586	Gm10337
19	ENSMUSG00000071649	B3gat3
X	ENSMUSG00000071722	Spin4
14	ENSMUSG00000072115	Ang
16	ENSMUSG00000072214	Sept5
15	ENSMUSG00000072235	Tuba1a
6	ENSMUSG00000072623	Zfp9
12	ENSMUSG00000072825	Cep170b
X	ENSMUSG00000072934	Trpc5os
6	ENSMUSG00000073154	9330158H04Rik
X	ENSMUSG00000073293	Nudt10
X	ENSMUSG00000073295	Nudt11
17	ENSMUSG00000073433	Arhgdig
17	ENSMUSG00000073437	D330041H03Rik
4	ENSMUSG00000073889	Il11ra1
4	ENSMUSG00000073987	Ggh
7	ENSMUSG00000074274	D930028M14Rik
7	ENSMUSG00000074364	Ehd2
9	ENSMUSG00000074415	2610203C20Rik
9	ENSMUSG00000074505	Fat3
2	ENSMUSG00000074607	Tox2
10	ENSMUSG00000074657	Kif5a
2	ENSMUSG00000074736	Syndig1
2	ENSMUSG00000074743	Thbd
2	ENSMUSG00000074916	Chst14
2	ENSMUSG00000074918	Inafm2
2	ENSMUSG00000074923	Pak6
2	ENSMUSG00000074968	Ano3
2	ENSMUSG00000075312	Gm13597
2	ENSMUSG00000075316	Scn9a
2	ENSMUSG00000075318	Scn2a1
2	ENSMUSG00000075334	Rprm
14	ENSMUSG00000075478	Slitrk1
2	ENSMUSG00000075514	Gm13375
11	ENSMUSG00000075588	Hoxb2
15	ENSMUSG00000075590	Nrbp2
11	ENSMUSG00000075702	Selm
2	ENSMUSG00000077990	Gm23134
17	ENSMUSG00000078247	Airn
X	ENSMUSG00000078317	F8a
4	ENSMUSG00000078350	Smim1
7	ENSMUSG00000078670	Fam174b
7	ENSMUSG00000078776	9530053A07Rik
7	ENSMUSG00000078794	Dact3
7	ENSMUSG00000078800	Bsph2
11	ENSMUSG00000078851	Hist3h2a
2	ENSMUSG00000079037	Prnp
8	ENSMUSG00000079157	Fam155a
2	ENSMUSG00000079277	Hoxd3
6	ENSMUSG00000079560	Hoxa3
9	ENSMUSG00000079669	Gm17396
4	ENSMUSG00000080911	Gm11918
2	ENSMUSG00000081056	Gm13998
6	ENSMUSG00000081113	Gm7308
3	ENSMUSG00000081355	Gm15264
2	ENSMUSG00000081800	Gm14200
6	ENSMUSG00000082120	Gm15720
11	ENSMUSG00000082243	Gm3810
11	ENSMUSG00000082286	Pisd-ps1
4	ENSMUSG00000082725	Gm12451
11	ENSMUSG00000082790	Gm12155
X	ENSMUSG00000083166	Gm8648
2	ENSMUSG00000083240	Gm13453
19	ENSMUSG00000083282	Ctsf
2	ENSMUSG00000083567	Gm11451
3	ENSMUSG00000083610	Oaz2-ps
X	ENSMUSG00000084202	Gm5398
12	ENSMUSG00000084604	Gm22205
11	ENSMUSG00000084844	Hoxb3os
4	ENSMUSG00000084910	C630043F03Rik
11	ENSMUSG00000085148	Mir22hg
4	ENSMUSG00000085395	Gm13056
11	ENSMUSG00000085645	Hoxb5os
2	ENSMUSG00000086141	9030622O22Rik
2	ENSMUSG00000086308	G630016G05Rik
16	ENSMUSG00000087141	Plcxd2
13	ENSMUSG00000087143	A830082K12Rik
4	ENSMUSG00000087381	Gm16008
X	ENSMUSG00000087620	5330434G04Rik
6	ENSMUSG00000087626	Gm15050
10	ENSMUSG00000087651	1500009L16Rik
6	ENSMUSG00000087658	Hotairm1
1	ENSMUSG00000088000	Gm25493
6	ENSMUSG00000089862	Gm16039
5	ENSMUSG00000089889	0610040B10Rik
2	ENSMUSG00000089902	Gm13625
5	ENSMUSG00000090061	Nwd2
16	ENSMUSG00000090223	Pcp4
16	ENSMUSG00000090386	Mir99ahg
7	ENSMUSG00000091002	Tcerg1l
2	ENSMUSG00000091337	Eid1
3	ENSMUSG00000091421	Gm4202
8	ENSMUSG00000091514	Gm17484
14	ENSMUSG00000091723	Gm17366
14	ENSMUSG00000091898	Tnnc1
1	ENSMUSG00000092083	Kcnb2
3	ENSMUSG00000093226	Gm25749
11	ENSMUSG00000093467	Gm20659
15	ENSMUSG00000093550	Higd1c
9	ENSMUSG00000093662	Gm20649
3	ENSMUSG00000094018	S100a2
3	ENSMUSG00000094392	Gm3788
8	ENSMUSG00000094500	Smim18
12	ENSMUSG00000094910	D430019H16Rik
7	ENSMUSG00000095115	Itpripl2
3	ENSMUSG00000096025	Ralyl
9	ENSMUSG00000096472	Cdkn2d
12	ENSMUSG00000096947	Gm26723
15	ENSMUSG00000096956	Snhg18
3	ENSMUSG00000097040	2610316D01Rik
17	ENSMUSG00000097049	6530411M01Rik
4	ENSMUSG00000097224	Gm26716
7	ENSMUSG00000097225	A330076H08Rik
3	ENSMUSG00000097311	Gm26871
X	ENSMUSG00000097340	Gm26617
17	ENSMUSG00000097350	4732491K20Rik
12	ENSMUSG00000097451	Rian
9	ENSMUSG00000097736	9530059O14Rik
5	ENSMUSG00000097767	Miat
14	ENSMUSG00000097794	Gm2990
10	ENSMUSG00000097889	Gm26541
X	ENSMUSG00000097961	Gm27000
7	ENSMUSG00000097974	Gm10605
12	ENSMUSG00000098061	Gm26945
12	ENSMUSG00000098202	B830012L14Rik
13	ENSMUSG00000098220	Gm27031
1	ENSMUSG00000098306	Gm28040
6	ENSMUSG00000098536	Gm27868
14	ENSMUSG00000098557	Kctd12
7	ENSMUSG00000098657	Gm27675
6	ENSMUSG00000098749	Gm27477
3	ENSMUSG00000098912	1500004A13Rik
17	ENSMUSG00000099797	Gm3145
10	ENSMUSG00000100143	C030027H14Rik
6	ENSMUSG00000100164	2610306M01Rik
14	ENSMUSG00000100241	Slc18a3
15	ENSMUSG00000101671	Gm28221
14	ENSMUSG00000102171	RP23-117H6.2
18	ENSMUSG00000102206	PCDHA9
12	ENSMUSG00000102657	RP23-204I16.3
3	ENSMUSG00000102938	RP23-333L19.1
1	ENSMUSG00000103421	Golt1a
5	ENSMUSG00000103429	AC113302.1
3	ENSMUSG00000103473	RP23-390C13.3
18	ENSMUSG00000104252	Pcdha4
