# Supplementary material for: Single-cell analyses of X Chromosome inactivation dynamics and pluripotency during differentiation
Source: Genome Res. 2016 Oct;26(10):1342–54. doi: 10.1101/gr.201954.115 (PMC5052059; doi:10.1101/gr.201954.115)
Supplement: Supplemental Material [file supp_gr.201954.115_Supplemental_Table_S5.xlsx]

## Sheet: table
Supplemental Table S5. Allelic expression ratio of the inactive Chr X divided by that of the active Chr X (sorted by coordinates, Methods part provided more details about XCI progression analysis)
ES2i.F				ES.F						delayed.Epi.F						Epi.F		Neuron.F
Activity of Chr Xs: 1.8 ~ 2.0		Activity of Chr Xs: 1.2 ~ 1.8		Activity of Chr Xs: 1.8 ~ 2.0		Activity of Chr Xs: 1.2 ~ 1.8		Activity of Chr Xs: 1.0 ~ 1.2		Activity of Chr Xs: 1.8 ~ 2.0		Activity of Chr Xs: 1.2 ~ 1.8		Activity of Chr Xs: 1.0 ~ 1.2		Activity of Chr Xs: 1.0 ~ 1.2		Activity of Chr Xs: 1.8 ~ 2.0		Activity of Chr Xs: 1.2 ~ 1.8		Activity of Chr Xs: 1.0 ~ 1.2
Prickle3	0.375690607734807	Gpkow	0.242424242424242	Gpkow	1.34928229665072	Gpkow	0.569230769230769	AU022751	0	Gpkow	1.33823529411765	Prickle3	0.291666666666667	Gpkow	0.0204081632653061	Dgkk	0.0168067226890756	Prickle3	0.208333333333333	Shroom4	0	Dgkk	0.0140449438202247
Gpkow	0.804804804804805	Wdr45	0.75	Wdr45	0.824074074074074	Wdr45	0.552238805970149	Gpkow	0	Wdr45	0.796116504854369	Gpkow	0.476489028213166	Wdr45	0	Gpkow	0.0133779264214047	Gpkow	0.587301587301587	Dgkk	0.345454545454546	Clcn5	0.136363636363636
Wdr45	1.20720720720721	Ccdc120	0.266666666666667	Praf2	1.07407407407407	Praf2	0.727272727272727	Wdr45	0	Tcfe3	1.26474622770919	Wdr45	1.06779661016949	Praf2	0.0172413793103448	Wdr45	0.0324324324324324	Wdr45	1.7093023255814	Clcn5	0	Syp	0
Tcfe3	1.03461918892186	Tcfe3	0.501893939393939	Tcfe3	1.05424200278164	Tcfe3	0.598901098901099	Praf2	0	Gripap1	0.673758865248227	Tcfe3	0.718124084025403	Tcfe3	0.0172642762284197	Praf2	0.0127388535031847	Praf2	0.84	Usp27x	0	Gpkow	0.0440414507772021
Pqbp1	1.13170731707317	Gripap1	0.7875	Gripap1	1.1125	Gripap1	0.18348623853211	Tcfe3	0	Pim2	0.902035623409669	Gripap1	0.493975903614458	Gripap1	0.00609756097560976	Tcfe3	0.00837138508371385	Tcfe3	0.289124668435013	Gpkow	0.2	Wdr45	0.216049382716049
Timm17b	1.10252365930599	Pqbp1	0.357664233576642	Pim2	0.9775	Pim2	0.463894967177243	Gripap1	0.25	Pqbp1	0.9	Pim2	0.362542128069331	Pim2	0.00399733510992672	Gripap1	0	Gripap1	0.1625	Wdr45	0.783950617283951	Praf2	0.242603550295858
Hdac6	1.09612983770287	Timm17b	0.547752808988764	Pqbp1	0.924	Pqbp1	0.556962025316456	Pim2	0.00588235294117647	Timm17b	1.19303797468354	Pqbp1	0.466911764705882	Pqbp1	0	Pim2	0.100719424460432	Pim2	1.01030927835052	Praf2	0.325581395348837	Tcfe3	0.105845181674566
Rbm3	0.928057553956835	Hdac6	0.54653937947494	Timm17b	0.826568265682657	Timm17b	0.693602693602694	Pqbp1	0	Pcsk1n	0.826530612244898	Timm17b	0.500416319733555	Timm17b	0.0223463687150838	Pqbp1	0.0144230769230769	Pqbp1	0.8	Ccdc120	0.321212121212121	Gripap1	0.116104868913858
Tbc1d25	0.957100591715976	Rbm3	0.701612903225806	Pcsk1n	1.10526315789474	Pcsk1n	0.302197802197802	Timm17b	0	Eras	0.951086956521739	Pcsk1n	0.348148148148148	Pcsk1n	0.0288808664259928	Timm17b	0.00188857412653447	Timm17b	0.563573883161512	Tcfe3	0.407051282051282	Slc35a2	0.225225225225225
Ebp	0.921506062539885	Tbc1d25	0.234887737478411	Eras	1.01720430107527	Eras	0.134920634920635	Pcsk1n	0.0540540540540541	Hdac6	0.850899742930591	Eras	0.418918918918919	Eras	0.026431718061674	Pcsk1n	0.0130890052356021	Pcsk1n	0.982758620689655	Gripap1	0.351648351648352	Pqbp1	0.188741721854305
Ftsj1	0.855292792792793	Ebp	0.371812080536913	Hdac6	0.87688098495212	Hdac6	0.580906148867314	Eras	0.0175438596491228	Rbm3	0.986577181208054	Hdac6	0.523376623376623	Hdac6	0.0191780821917808	Eras	0.0072992700729927	Hdac6	1.09906291834003	Pim2	0	Timm17b	0.313144329896907
Rpgr	0.693386773547094	Ftsj1	0.635857461024499	Rbm3	0.769417475728155	Suv39h1	0.44	Hdac6	0	Tbc1d25	0.883064516129032	Wdr13	0.453125	Rbm3	0	Hdac6	0.00133422281521014	Suv39h1	1.72727272727273	Slc35a2	0.592592592592593	Hdac6	0.0866110448947159
Atp6ap2	1.0962962962963	Rpgr	0.228155339805825	Tbc1d25	0.93046357615894	Rbm3	0.716157205240175	Wdr13	0	Ebp	0.539638386648122	Rbm3	0.524046434494196	Tbc1d25	0.0152671755725191	Suv39h1	0.0206185567010309	Tbc1d25	2.78723404255319	Pqbp1	0.326923076923077	Suv39h1	0.122727272727273
1810030O07Rik	1.68534482758621	Atp6ap2	0.745417515274949	Ebp	0.902785076195481	Tbc1d25	0.56875	Rbm3	0	Porcn	1.05714285714286	Tbc1d25	0.39027027027027	Ebp	0.00583090379008746	Wdr13	0	Ebp	1.06930693069307	Timm17b	0.728205128205128	Wdr13	0.226818830242511
Usp9x	0.939490445859873	1810030O07Rik	2.57692307692308	Porcn	0.942028985507246	Ebp	0.54149377593361	Tbc1d25	0	Ftsj1	0.858477970627503	Ebp	0.284156142365098	Ftsj1	0.0235849056603774	Tbc1d25	0	Ftsj1	1.38601823708207	Pcsk1n	0.170103092783505	Tbc1d25	0.20952380952381
Ddx3x	0.903571428571428	Med14	0.704545454545454	Ftsj1	0.771857410881801	Ftsj1	0.858347386172007	Ebp	0.0263157894736842	Rpgr	0.50207468879668	Porcn	0.372727272727273	Rpgr	0.0366666666666667	Ebp	0	Rpgr	4	Hdac6	0.441400304414003	Ebp	0.120354963948974
Maoa	0.742424242424242	Usp9x	0.481481481481481	Rpgr	1.53257328990228	Rpgr	0.402777777777778	Ftsj1	0	Atp6ap2	0.933933933933934	Ftsj1	0.524911927528938	Atp6ap2	0.0438247011952191	Ftsj1	0	Bcor	1.21739130434783	Suv39h1	1.3125	Ftsj1	0.234361233480176
Fundc1	0.791044776119403	Ddx3x	0.518394648829431	Atp6ap2	0.981047937569677	Atp6ap2	1	Rpgr	0	1810030O07Rik	0.684210526315789	Rpgr	0.490842490842491	Med14	0.0104166666666667	Rpgr	0.0121028744326778	Atp6ap2	1.36075949367089	Gm6787	0	Rpgr	0
Kdm6a	0.91866028708134	Maoa	0.595744680851064	1810030O07Rik	1.15510204081633	Med14	0.952755905511811	Atp6ap2	0	Med14	0.99375	Atp6ap2	0.543988269794721	Usp9x	0.0419161676646707	Bcor	0.00571428571428571	Gm4984	0	Wdr13	1.16129032258065	Bcor	0
Ndufb11	0.811691209281571	Fundc1	0.563492063492063	Med14	0.880658436213992	Usp9x	0.596244131455399	Med14	0	Usp9x	1.00526315789474	1810030O07Rik	1.0233918128655	Ddx3x	0.0102459016393443	Atp6ap2	0.0175658720200753	1810030O07Rik	0.37037037037037	Tbc1d25	2.46153846153846	Atp6ap2	0.0379918588873813
Uba1	0.958233572758712	Kdm6a	0.5	Usp9x	0.865525672371638	Ddx3x	0.687285223367698	Usp9x	0.0344827586206897	Ddx3x	0.728813559322034	Med14	0.519685039370079	Maoa	0.0454545454545455	1810030O07Rik	0	Med14	0.399122807017544	Ebp	0.175718849840256	1810030O07Rik	0.313953488372093
Cdk16	0.917748917748918	Ndufb11	0.439276485788114	Ddx3x	1.00267737617135	Maoa	0.32	Ddx3x	0	Maoa	1.01807228915663	Usp9x	0.459715639810427	Fundc1	0	Med14	0.0327868852459016	Usp9x	1.14754098360656	Porcn	0.111111111111111	Med14	0.105820105820106
Araf	1.09090909090909	Uba1	0.564351103931072	Maoa	0.855828220858896	Fundc1	0.514285714285714	Cask	0	Fundc1	1.44047619047619	Ddx3x	0.51463963963964	Kdm6a	0.0593220338983051	Usp9x	0.00732600732600733	Ddx3x	0.666666666666667	Ftsj1	0.296296296296296	Usp9x	0.0793201133144476
Cfp	0.5	Cdk16	0.472868217054264	Fundc1	0.923976608187134	Kdm6a	0.772151898734177	Maoa	0	Kdm6a	0.697478991596639	Maoa	0.769811320754717	Ndufb11	0.00688073394495413	Ddx3x	0.048723897911833	Maoa	1.41935483870968	Rpgr	0.517857142857143	Ddx3x	0.0898203592814371
Elk1	0.897959183673469	Usp11	0.188405797101449	Kdm6a	0.977099236641221	Ndufb11	0.673629242819843	Fundc1	0	Ndufb11	0.760750586395622	Fundc1	0.755555555555556	Uba1	0.0120772946859903	Cask	0	Fundc1	0.696969696969697	Bcor	0.0384615384615385	Maoa	0
Uxt	0.730038022813688	Araf	0.455223880597015	Ndufb11	0.952261306532663	Uba1	0.789752650176678	Kdm6a	0	Uba1	0.960497439648866	Kdm6a	0.479338842975207	Cdk16	0.0045045045045045	Maoa	0.0365296803652968	Kdm6a	1.75	Atp6ap2	0.529411764705882	Fundc1	0.09375
A230072C01Rik	0.594427244582043	Cfp	0.365671641791045	Uba1	0.939473684210526	Cdk16	0.450980392156863	Ndufb11	0	Cdk16	1.03389830508475	Ndufb11	0.51507446422085	Usp11	0.0447154471544715	Fundc1	0.0158730158730159	Ndufb11	0.920854271356784	1810030O07Rik	0.0769230769230769	Kdm6a	0.0333333333333333
Klhl13	0.63588850174216	Elk1	1.11111111111111	Cdk16	0.832271762208068	Usp11	0.774509803921569	Uba1	0.00668896321070234	Usp11	0.613924050632911	Uba1	0.601396648044693	Araf	0.0194174757281553	Kdm6a	0.248756218905473	Uba1	0.907446808510638	Med14	0.258426966292135	Ndufb11	0.165558019216556
Pgrmc1	1.61233480176211	Uxt	0.396946564885496	Usp11	0.813868613138686	Araf	1.09302325581395	Cdk16	0	Araf	0.84297520661157	Cdk16	0.479591836734694	Elk1	0	Ndufb11	0.00563380281690141	Cdk16	1.85714285714286	Usp9x	0.322834645669291	Uba1	0.211238293444329
Nkap	1.05726872246696	A230072C01Rik	0.213636363636364	Araf	1.1405750798722	Elk1	0.931818181818182	Usp11	0	Cfp	0.392156862745098	Usp11	0.427895981087471	Uxt	0.00900900900900901	Uba1	0.00548564052920297	Usp11	0.877551020408163	Ddx3x	0.519230769230769	Cdk16	0.228654124457308
Lamp2	0.947183098591549	Klhl13	0.311594202898551	Uxt	0.977578475336323	Uxt	0.776595744680851	Araf	0.2	Elk1	1.41666666666667	Araf	0.720524017467249	A230072C01Rik	0.0914285714285714	Cdk16	0.0522727272727273	Araf	0.651162790697674	Cask	0.706666666666667	Usp11	0.149484536082474
Cul4b	0.875968992248062	Pgrmc1	1.50769230769231	A230072C01Rik	0.928571428571429	A230072C01Rik	0.76	Elk1	0	Uxt	0.578947368421053	Elk1	0.447236180904523	Klhl13	0.00843170320404722	Araf	0.00996677740863787	Elk1	0.142857142857143	Maoa	0.642857142857143	Araf	0.117994100294985
Xiap	0.654867256637168	Akap17b	0.142857142857143	Klhl13	1.25765306122449	Klhl13	0.286604361370716	Uxt	0.0714285714285714	A230072C01Rik	0.935185185185185	Uxt	0.341637010676157	Pgrmc1	0.0245901639344262	Elk1	0.0260869565217391	Uxt	1.62068965517241	Fundc1	0.134615384615385	Uxt	0.0952380952380952
Ocrl	1.10323886639676	Nkap	0.640776699029126	Pgrmc1	0.98145285935085	Pgrmc1	0.606936416184971	A230072C01Rik	0	Klhl13	0.645224171539961	A230072C01Rik	0.257731958762887	Nkap	0	Uxt	0	Klhl13	9.31578947368421	Kdm6a	1.21428571428571	Klhl13	0.133004926108374
Utp14a	0.893112947658402	Lamp2	0.451612903225806	Nkap	0.949333333333333	Nkap	0.374233128834356	Zfp182	0	Pgrmc1	1.75688073394495	Klhl13	0.255371900826446	Cul4b	0	A230072C01Rik	0.00282485875706215	Pgrmc1	0.563380281690141	Chst7	0	Pgrmc1	0.0339425587467363
Slc25a14	0.939597315436242	Cul4b	0.54	Cul4b	1.08247422680412	Cul4b	0.384615384615385	Klhl13	0	Nkap	0.992857142857143	Pgrmc1	0.721544715447154	Ocrl	0	Zfp182	0	Nkap	0.342342342342342	Ndufb11	0.569965870307167	Nkap	0.178997613365155
Rbmx2	0.867924528301887	Xiap	0.4	Ocrl	0.964705882352941	Xiap	0.417910447761194	Pgrmc1	0	Lamp2	0.961538461538462	Akap17b	0.275862068965517	Utp14a	0.036231884057971	Pgrmc1	0.00510204081632653	Zbtb33	1.36	Uba1	0.512992455993294	Lamp2	0.00409836065573771
Phf6	0.652892561983471	Ocrl	0.614232209737828	Utp14a	1.03262558259969	Ocrl	0.269662921348315	Nkap	0	Cul4b	0.771428571428571	Nkap	0.507978723404255	Rbmx2	0.0275229357798165	Nkap	0.0113314447592068	Lamp2	0.264705882352941	Cdk16	0.454183266932271	Cul4b	0.043859649122807
Hprt	1.25261780104712	Utp14a	0.470046082949309	Slc25a14	0.839080459770115	Utp14a	0.575452716297787	Zbtb33	0	Ocrl	1.33333333333333	Cul4b	0.5	Gpc4	0.00740740740740741	Lamp2	0	Cul4b	1.71794871794872	Usp11	0.424528301886792	Xiap	0.015748031496063
Mmgt1	1.12903225806452	Elf4	0.56	Rbmx2	0.869565217391304	Rbmx2	0.743362831858407	Cul4b	0	Utp14a	1.14264036418816	Ocrl	0.4625	Gpc3	0.00641025641025641	Cul4b	0.0087719298245614	Xiap	0.333333333333333	Araf	0.452380952380952	Ocrl	0.0050125313283208
Fhl1	1.15671641791045	Rbmx2	0.304093567251462	Gpc4	0.865671641791045	Gpc4	0.564516129032258	Xiap	0	Rbmx2	0.769230769230769	Utp14a	0.481040086673889	Phf6	0.0284090909090909	Ocrl	0.00401606425702811	Ocrl	0.28	Cfp	0	Utp14a	0.0120300751879699
Htatsf1	1.09424083769634	6720401G13Rik	2.71428571428571	Phf6	0.765342960288809	Gpc3	0.621621621621622	Ocrl	0	Enox2	1	Rbmx2	0.401496259351621	Hprt	0.00937207122774133	Utp14a	0.0414772727272727	Zdhhc9	0.227272727272727	Elk1	0	Rbmx2	0
Rbmx	1.575	Gpc4	1.05	Hprt	0.895067546339931	Phf6	0.655913978494624	Utp14a	0	Gpc4	0.73972602739726	Enox2	0.468926553672316	Mtap7d3	0.0072992700729927	Slc25a14	0	Utp14a	0.916666666666667	Uxt	0.466666666666667	Enox2	0
Mcf2	0.880519480519481	Phf6	0.266666666666667	Fam122b	0.772455089820359	Hprt	0.5478515625	Elf4	0	Phf6	0.723404255319149	Gpc4	0.205882352941176	Htatsf1	0.00401606425702811	Rbmx2	0.00728155339805825	Rbmx2	2.12121212121212	A230072C01Rik	0	6720401G13Rik	0
Atp11c	1.11111111111111	Hprt	0.835140997830803	Mmgt1	0.859223300970874	Fam122b	0.28125	Rbmx2	0	Hprt	1.1005859375	Gpc3	0.48	Rbmx	0.015	6720401G13Rik	0	Gpc4	0.345679012345679	Klhl13	0.0816326530612245	Gpc4	0.0212577502214349
Fmr1	0.635593220338983	Mmgt1	0.567164179104478	Mtap7d3	1.39795918367347	Mmgt1	0.577777777777778	Enox2	0.125	Fam122b	0.817073170731707	Phf6	0.487878787878788	Fmr1nb	0	Gpc4	0	Phf6	1.94117647058824	Dock11	0	Gpc3	0.00125
Fmr1nb	0.96056338028169	Fhl1	0.296	Htatsf1	0.864541832669323	Htatsf1	0.781512605042017	Usp26	0	Ddx26b	0.446808510638298	Hprt	0.595751742449386	1110012L19Rik	0	Gpc3	0.00442477876106195	Hprt	0.611810261374637	Pgrmc1	0.190677966101695	Hprt	0.0371148459383754
1110012L19Rik	0.949709864603482	Htatsf1	0.602564102564103	Rbmx	0.635135135135135	Rbmx	0.322916666666667	Gpc4	0	Htatsf1	0.806451612903226	Fam122b	1.36283185840708	Cetn2	0.00806451612903226	Phf6	0.00316455696202532	Fam122b	1.0531914893617	Nkap	0.194029850746269	Fam122b	0
BC023829	1.12359550561798	Mcf2	0.463917525773196	Fmr1	0.625766871165644	Atp11c	0.382352941176471	Gpc3	0	Rbmx	1.88541666666667	Htatsf1	0.526785714285714	Nsdhl	0	Hprt	0.00113960113960114	Ncrna00086	0	Zbtb33	0.03125	Mmgt1	0.0398293029871977
Cetn2	1.02577319587629	Atp11c	0.298245614035088	Fmr1nb	1.12853470437018	Fmr1nb	0.362068965517241	Ccdc160	0	Mcf2	1.12727272727273	Rbmx	0.39906103286385	Haus7	0.00628930817610063	Fam122b	0	Mmgt1	0.882352941176471	Lamp2	0.038961038961039	Fhl1	0.0707762557077626
Nsdhl	0.783171521035599	Fmr1	0.578125	1110012L19Rik	0.948717948717949	1110012L19Rik	0.543478260869565	Phf6	0	Atp11c	0.930232558139535	Mcf2	0.45360824742268	Bcap31	0.0109769484083425	Mospd1	0.0149253731343284	Fhl1	1.11111111111111	Cul4b	0.409090909090909	Htatsf1	0.0305343511450382
Pnma5	1.07751937984496	Fmr1nb	0.884615384615385	Cetn2	0.916342412451362	Cetn2	0.697916666666667	Hprt	0.00492610837438424	Fmr1	1.14634146341463	Fmr1	0.714285714285714	Idh3g	0.0107632093933464	Cxx1c	0	Mtap7d3	5.14285714285714	Xiap	0.27906976744186	Rbmx	0.00352112676056338
Haus7	0.842818428184282	Ids	0.142857142857143	Nsdhl	1.06813186813187	Nsdhl	0.766423357664234	Fam122b	0	Fmr1nb	0.928571428571429	Fmr1nb	0.669082125603865	Naa10	0.0148148148148148	Mmgt1	0	Htatsf1	1.43181818181818	Ocrl	0.0735294117647059	Ids	0.0557275541795666
Bcap31	1.05551989730424	1110012L19Rik	0.636363636363636	Pnma5	1.54285714285714	F8a	0.904761904761905	Ddx26b	0	1110012L19Rik	1.2875	1110012L19Rik	0.843636363636364	Hcfc1	0.0050547598989048	Htatsf1	0.00399201596806387	Rbmx	3.08	Zdhhc9	0	1110012L19Rik	0.0031496062992126
Idh3g	0.949961210240497	BC023829	0.386363636363636	Haus7	0.955156950672646	Haus7	0.602409638554217	Mmgt1	0	Cetn2	0.994186046511628	Cetn2	0.586337760910816	Irak1	0.0659340659340659	Rbmx	0	Gm364	0.354838709677419	Utp14a	0.279569892473118	BC023829	0.0696517412935323
Naa10	1.19565217391304	Cetn2	0.443983402489627	Dusp9	1.33125	Dusp9	0.32	Fhl1	0	Nsdhl	0.761363636363636	Nsdhl	0.484784889821616	Mecp2	0.0128205128205128	1110012L19Rik	0.0136157337367625	Fmr1	0.947368421052632	Bcorl1	0.2	Cetn2	0.00318471337579618
Hcfc1	0.95299727520436	Nsdhl	0.51219512195122	Bcap31	0.865705128205128	Bcap31	0.499436302142052	Mtap7d3	0.0625	Pnma5	0.595092024539877	Haus7	0.424501424501424	Flna	0.0134408602150538	BC023829	0.00431965442764579	Fmr1nb	0.701612903225806	Elf4	0	Nsdhl	0.0487804878048781
Irak1	0.893364928909953	Pnma5	0.926229508196721	Idh3g	0.92952482648158	Idh3g	0.691784702549575	Htatsf1	0	F8a	0.479166666666667	Dusp9	0.558951965065502	Emd	0.004	Cetn2	0.0110294117647059	1110012L19Rik	0.398203592814371	Gpc4	0.00816326530612245	F8a	0.0576923076923077
Flna	0.697127937336815	Haus7	0.598802395209581	Naa10	1.06963788300836	Naa10	0.721739130434783	Mcf2	0	Haus7	0.747252747252747	Bcap31	0.547557840616967	Taz	0.0240963855421687	Nsdhl	0.00192678227360308	Cetn2	2.14705882352941	Gpc3	0.0275	Haus7	0.0158730158730159
Emd	0.74	Bcap31	0.628423390081421	Hcfc1	1.12987012987013	Hcfc1	0.786885245901639	Fmr1	0	Dusp9	0.669064748201439	Idh3g	0.584659090909091	Fam50a	0.0607734806629834	F8a	0.00485436893203884	Nsdhl	1.61666666666667	Phf6	0.0952380952380952	Dusp9	0.0412844036697248
Taz	1.18543046357616	Idh3g	0.582447855175128	Irak1	0.77319587628866	Irak1	0.96	Fmr1nb	0	Bcap31	1.16583416583417	Pdzd4	0.375	G6pdx	0.0380116959064327	Haus7	0.0054525627044711	Pnma5	1.02702702702703	Hprt	0.372477064220183	Bcap31	0.0130530973451327
Fam50a	1.06422018348624	Naa10	1.10077519379845	Flna	1.02220166512488	Flna	0.708015267175573	1110012L19Rik	0	Idh3g	0.955380577427822	Naa10	0.657575757575758	Dkc1	0.00672143390589993	Dusp9	0	F8a	1.94736842105263	Fam122b	0.281553398058252	Idh3g	0.0568910256410256
Lage3	1.82758620689655	Hcfc1	0.463227222832053	Emd	1.02861952861953	Emd	0.719858156028369	BC023829	0	Pdzd4	0.758620689655172	Hcfc1	0.484148307361634	Brcc3	0.00593471810089021	Bcap31	0.00393081761006289	Haus7	0.614173228346457	Mospd1	0.192307692307692	Naa10	0.0584415584415584
Fam3a	0.853658536585366	Irak1	0.6	Rpl10	0.73109243697479	Rpl10	0.581395348837209	Vma21	0	Naa10	1.171875	Irak1	0.538983050847458	Vbp1	0.00491803278688525	Idh3g	0.0218671152228764	Dusp9	2.15909090909091	Mmgt1	0.6	Hcfc1	0.000838926174496644
G6pdx	1.16300129366106	Flna	0.467213114754098	Gdi1	0.776595744680851	Taz	0.619047619047619	Cetn2	0	Hcfc1	1.13333333333333	Flna	0.506720430107527	Tmem47	0	Naa10	0.00298507462686567	Bcap31	0.686980609418283	Fhl1	0.0169491525423729	Irak1	0.0537634408602151
Dkc1	0.803191489361702	Emd	0.681159420289855	Fam50a	0.977477477477477	Fam50a	0.585185185185185	Nsdhl	0	Irak1	0.57258064516129	Emd	0.488670694864048	Gyk	0	Hcfc1	0.00569063631660631	Idh3g	1.00980392156863	Htatsf1	0.135593220338983	Flna	0.0272697040239441
Mpp1	1.41935483870968	Taz	1.16363636363636	Lage3	0.656140350877193	Lage3	0.65979381443299	Pnma5	0	Mecp2	0.473684210526316	Rpl10	0.780821917808219	Pola1	0.015625	Irak1	0.0481481481481481	Naa10	0.722222222222222	Rbmx	0.112244897959184	Emd	0.00224719101123595
Brcc3	0.848722986247544	Gdi1	0.787878787878788	G6pdx	0.807427785419532	Slc10a3	0.0789473684210526	Haus7	0	Flna	0.95910780669145	Taz	0.783625730994152	Pdk3	0.00898203592814371	Mecp2	0	Hcfc1	0.737704918032787	Gm364	1.77464788732394	Taz	0.021978021978022
Vbp1	0.946096654275093	Fam50a	0.502283105022831	Dkc1	0.938063986874487	G6pdx	0.594155844155844	Dusp9	0	Emd	1.14245014245014	Gdi1	0.654867256637168	Maged1	0.0140845070422535	Flna	0.00334168755221387	Irak1	1.11267605633803	Atp11c	0	Gdi1	0.0750853242320819
Dmd	0.869109947643979	Lage3	1.28571428571429	Mpp1	0.914179104477612	Dkc1	0.782178217821782	Bcap31	0.00806451612903226	Fam50a	1.08227848101266	Fam50a	0.525691699604743	Gspt2	0	Emd	0.0132743362831858	Flna	0.700980392156863	Ids	0.181159420289855	Fam50a	0.0330188679245283
Tab3	0.973118279569892	Fam3a	0.655555555555556	Brcc3	0.802303262955854	Brcc3	0.745098039215686	Idh3g	0.00367647058823529	Lage3	2.30909090909091	Lage3	1.1	Fam123b	0.0151515151515152	Rpl10	0.0212765957446809	Emd	0.63768115942029	1110012L19Rik	0.304552590266876	Lage3	0.147058823529412
Gyk	0.785714285714286	Ikbkg	0.56	Vbp1	0.883898305084746	Vbp1	0.516216216216216	Pdzd4	0	G6pdx	0.873655913978495	Fam3a	0.483870967741935	Las1l	0.032258064516129	Taz	0.00704225352112676	Rpl10	1.21428571428571	BC023829	0	Fam3a	0.012987012987013
Pola1	0.935560859188544	G6pdx	1.05723905723906	Dmd	1.10483870967742	Tmem47	0.450980392156863	Naa10	0	Dkc1	0.802035152636448	G6pdx	0.725490196078431	Yipf6	0	Gdi1	0.00561797752808989	Taz	0.872340425531915	Cd99l2	0	G6pdx	0
Pcyt1b	0.784403669724771	Dkc1	0.337779895188185	Gyk	1.14285714285714	Pola1	0.691275167785235	Hcfc1	0.00943396226415094	Mpp1	1.55555555555556	Dkc1	0.568132346538964	Pja1	0	Fam50a	0.0028169014084507	Gdi1	1.42857142857143	Vma21	0.1875	Dkc1	0.0245700245700246
Pdk3	0.789473684210526	Mpp1	1.05	Pola1	1.08355091383812	Pcyt1b	0.0902777777777778	Irak1	0.08	Brcc3	1.26591760299625	Mpp1	0.947368421052632	Igbp1	0	Lage3	0.0254237288135593	Fam50a	0.535211267605634	Cetn2	0.266666666666667	Mpp1	0
Apoo	2.35593220338983	Brcc3	0.473520249221184	Pcyt1b	1.27807486631016	Pdk3	0.269349845201238	Mecp2	0	Vbp1	0.85377358490566	Brcc3	0.534513274336283	Pdzd11	0	Fam3a	0.00318471337579618	Lage3	0.207142857142857	Nsdhl	0.1875	Brcc3	0.0267857142857143
Maged1	1.07394366197183	Vbp1	0.490467937608319	Pdk3	1.10949868073879	Apoo	0.4	Tktl1	0	Prkx	0.647058823529412	Vbp1	0.43862660944206	Kif4	0.0726744186046512	Ikbkg	0	Slc10a3	0.19672131147541	F8a	0.027027027027027	Vbp1	0.0450819672131148
Las1l	1.07377049180328	4933407K13Rik	0.736842105263158	Apoo	0.644230769230769	Maged1	0.32258064516129	Flna	0	Tmem47	0.827838827838828	Tbl1x	0.520833333333333	Snx12	0	G6pdx	0.0239880059970015	Fam3a	1.28070175438596	Haus7	0.20253164556962	Tab3	0.00239234449760766
Yipf6	1.07941176470588	Prkx	0.604651162790698	Maged1	0.847094801223242	Las1l	0.879032258064516	Emd	0	Tab3	0.951807228915663	Tmem47	0.476056338028169	Nono	0	Dkc1	0.00110926234054354	Ikbkg	0.181818181818182	Dusp9	0.306569343065693	Pola1	0.0147058823529412
Igbp1	1.01027397260274	Dmd	0.475728155339806	Las1l	0.800724637681159	Yipf6	0.446280991735537	Rpl10	0	Gyk	1.25316455696203	Tab3	0.231707317073171	Ogt	0.0680147058823529	Brcc3	0.00332778702163062	G6pdx	0.976470588235294	Pnck	2.11111111111111	Pdk3	0.0162932790224033
Pdzd11	1.06129032258065	Tab3	0.430656934306569	Yipf6	0.974654377880184	Igbp1	0.883720930232558	Fam50a	0	Pola1	0.854166666666667	Gyk	0.719230769230769	Ercc6l	0.025	Vbp1	0.00180995475113122	Dkc1	2.77441077441077	Bcap31	0.258637709772952	Apoo	0.0641025641025641
Kif4	0.845283018867925	Gyk	0.515625	Igbp1	0.668539325842697	Pdzd11	0.6125	Lage3	0	Pcyt1b	0.776859504132231	Pola1	0.553140096618358	Chic1	0	Prkx	0	Mpp1	0.666666666666667	Idh3g	0.468267581475129	Maged1	0.0482456140350877
Snx12	0.984536082474227	Pola1	0.53960396039604	Pdzd11	1.2076124567474	Kif4	0.529411764705882	Fam3a	0	Pdk3	0.984962406015038	Pcyt1b	0.446927374301676	Rlim	0.0559440559440559	Tmem47	0.000753579502637528	Brcc3	0.22680412371134	Pdzd4	0	Zxdb	0
Zmym3	1.16216216216216	Pcyt1b	0.354609929078014	Kif4	0.954724409448819	Tex11	0.0465116279069767	G6pdx	0.0204081632653061	Zfx	0.2	Pdk3	0.410339256865913	Abcb7	0	Tab3	0	Vbp1	1.21621621621622	L1cam	0.408163265306122	Fam123b	0.00719424460431655
Nono	1.00328407224959	Pdk3	0.357746478873239	Snx12	0.959302325581395	Snx12	0.584615384615385	Dkc1	0	Apoo	4.03703703703704	Apoo	1.80952380952381	5530601H04Rik	0	Gyk	0	Prkx	0.944444444444444	Naa10	0.130434782608696	Zc4h2	0.11070110701107
Ogt	0.890155440414508	Apoo	12.6666666666667	Zmym3	0.842253521126761	Nono	0.583011583011583	Mpp1	0	Maged1	1.05833333333333	Maged1	0.562982005141388	2610029G23Rik	0.0048828125	Pola1	0	Tmem47	0.823529411764706	Hcfc1	0.138364779874214	Las1l	0.0746753246753247
Ercc6l	0.893970893970894	Maged1	0.794392523364486	Nono	0.964577656675749	Taf1	0.130434782608696	Brcc3	0	Las1l	1.21212121212121	Gspt2	0.25	Atrx	0.0381526104417671	Pdk3	0	Dmd	0.577464788732394	Irak1	1.10666666666667	Yipf6	0.369969040247678
Cited1	1.24137931034483	Fam123b	0.470588235294118	Ogt	1	Ogt	0.776223776223776	Vbp1	0	Yipf6	1.34463276836158	Fam123b	0.577235772357723	Magt1	0.0666666666666667	Apoo	0	Tab3	2.66666666666667	Mecp2	0.1	Efnb1	0
Rlim	1.01639344262295	Zc4h2	0.473684210526316	Ercc6l	0.760070052539405	Ercc6l	0.327586206896552	4933407K13Rik	0	Igbp1	0.702127659574468	Las1l	0.535008976660682	Sh3bgrl	0	Maged1	0.0025	Gyk	0.607142857142857	Flna	0.785500299580587	Pja1	0.00381679389312977
Abcb7	1.01069518716578	Las1l	0.609958506224066	Rlim	0.798092209856916	Rlim	0.190274841437632	Tmem47	0	Pdzd11	0.850340136054422	Yipf6	0.646396396396396	Rps6ka6	0.00305810397553517	Fam123b	0	Pola1	1.21590909090909	Emd	0.593548387096774	Igbp1	0.0552486187845304
5530601H04Rik	0.648148148148148	Yipf6	0.369369369369369	2610029G23Rik	0.979845626072041	5530601H04Rik	0.293103448275862	Dmd	0	Kif4	0.879781420765027	Pja1	0.214814814814815	Cstf2	0	Zc4h2	0	Pcyt1b	1.28787878787879	Taz	0.592592592592593	Pdzd11	0.0727272727272727
2610029G23Rik	0.787414965986394	Eda	0	Atrx	0.835097001763669	2610029G23Rik	0.710526315789474	Tab3	0	Snx12	0.649484536082474	Igbp1	0.512121212121212	Cenpi	0	Las1l	0.00155763239875389	Pdk3	1.59459459459459	Gdi1	0.654761904761905	Kif4	0.0985352862849534
Atrx	0.88382099827883	Igbp1	0.460606060606061	Magt1	0.537688442211055	Atrx	0.733333333333333	Gyk	0	Zmym3	0.680327868852459	Pdzd11	0.417445482866044	Armcx1	0.0056657223796034	Yipf6	0.0036563071297989	Apoo	0	Fam50a	0.561224489795918	Snx12	0.0447761194029851
Magt1	0.791946308724832	Pdzd11	0.742424242424242	Sh3bgrl	1.40196078431373	Atp7a	0	Pola1	0	Nono	0.91640866873065	Kif4	0.524774774774775	Gprasp1	0.00649350649350649	Pja1	0	Maged1	1.09230769230769	Plxna3	0.197183098591549	Med12	0.00980392156862745
Atp7a	0.844311377245509	Kif4	0.329268292682927	Rps6ka6	0.745	Lpar4	0.150943396226415	Pcyt1b	0	Ogt	0.772182254196643	Snx12	0.603658536585366	Bhlhb9	0	Igbp1	0.00373134328358209	Gspt2	1.68	Lage3	0.243589743589744	Zmym3	0.00443786982248521
Rps6ka6	0.914163090128755	Snx12	0.443298969072165	Cstf2	0.827956989247312	Itm2a	0.209876543209877	Pdk3	0.0192307692307692	Ercc6l	1.05633802816901	Zmym3	0.577981651376147	Arxes2	0.0152173913043478	Pdzd11	0.00984251968503937	Fam123b	0.125	Slc10a3	0.578947368421053	Nono	0.0453400503778338
Cenpi	1.29801324503311	Zmym3	0.451851851851852	Cenpi	1.15723270440252	Hmgn5	0.361111111111111	AU015836	0.25	Tsx	3.16666666666667	Nono	0.401554404145078	Arxes1	0.00555555555555556	Kif4	0	Las1l	0.532846715328467	Fam3a	0.277777777777778	Ogt	0.142335766423358
Armcx1	0.80794701986755	Nono	0.537162162162162	Armcx1	0.923460898502496	Sh3bgrl	0.269230769230769	Apoo	0	Xist	0.868421052631579	Ogt	0.581687612208258	Wbp5	0.015017667844523	Snx12	0	Pja1	2.0625	G6pdx	0.220820189274448	Cited1	0.00942928039702233
Gprasp1	1.07960199004975	Ogt	0.427435387673956	Gprasp1	0.893732970027248	Rps6ka6	1.14912280701754	Maged1	0.0454545454545455	Rlim	0.598145285935085	Ercc6l	0.556263269639066	Tmsb15l	0.00260416666666667	Med12	0	Igbp1	1.14705882352941	Dkc1	0.244755244755245	Chic1	0.0050761421319797
Bhlhb9	1.07017543859649	Ercc6l	0.530516431924883	Bhlhb9	0.81057268722467	Cenpi	0.72972972972973	Gspt2	0	2610029G23Rik	0.737179487179487	Chic1	0.669902912621359	Tmsb15b2	0	Nono	0.00625	Pdzd11	1.02919708029197	Mpp1	0.714285714285714	Rlim	0.01110550227158
Arxes2	0.747252747252747	Rlim	0.835106382978723	Arxes2	1.00953678474114	Armcx1	0.240437158469945	Fam123b	0	Atrx	0.827160493827161	Rlim	0.314285714285714	Tmsb15b1	0.0099009900990099	Ogt	0.00298953662182362	Kif4	2.76	Brcc3	0.0833333333333333	Abcb7	0.0310077519379845
Arxes1	0.652873563218391	C77370	0.685714285714286	Arxes1	1.09941520467836	Gprasp1	0.275590551181102	Las1l	0.0333333333333333	Magt1	0.6	5530601H04Rik	0.629310344827586	Trap1a	0.0826446280991736	Ercc6l	0.0170777988614801	Tex11	0.25	Vbp1	0.456	2610029G23Rik	0.0711409395973154
Wbp5	0.880434782608696	Abcb7	0.560747663551402	Wbp5	1.00747198007472	Bhlhb9	0.5	Yipf6	0	Itm2a	0.637630662020906	2610029G23Rik	0.464269248501614	Prps1	0.00668058455114823	Chic1	0.0347826086956522	Snx12	1.3125	Prkx	0	Atrx	0.00933125972006221
Trap1a	1.22740524781341	5530601H04Rik	0.636363636363636	Tmsb15l	1.24812030075188	Arxes2	0.420512820512821	Pja1	0	2610002M06Rik	0.557377049180328	Atrx	0.506901840490797	Psmd10	0.0033003300330033	Rlim	0.00092678405931418	Zmym3	0.137254901960784	Tmem47	0.195439739413681	Magt1	0.00267379679144385
Prps1	0.800904088050314	2610029G23Rik	0.591644204851752	Tmsb15b2	1.2007299270073	Arxes1	0.542857142857143	Igbp1	0	Sh3bgrl	1.07971014492754	Magt1	0.382716049382716	Acsl4	0.00735294117647059	Abcb7	0.00746268656716418	Nono	0.56701030927835	Dmd	0.195121951219512	Atp7a	0.028
Psmd10	0.764904386951631	Atrx	0.356697819314642	Tmsb15b1	1.12931034482759	Wbp5	0.278443113772455	Pdzd11	0	Rps6ka6	0.727272727272727	Itm2a	0.20817843866171	Alg13	0.00771010023130301	5530601H04Rik	0.121951219512195	Ogt	0.782945736434108	Tab3	0	2610002M06Rik	0
Nxt2	1.61475409836066	Magt1	0.507246376811594	Trap1a	0.805949008498584	BC065397	0.35	Kif4	0	Cenpi	0.875	Rps6ka6	0.514450867052023	Apex2	0	2610029G23Rik	0.0881174899866489	Ercc6l	1.11666666666667	Gyk	0	Hmgn5	0.0309278350515464
Acsl4	0.648464163822526	Atp7a	0.894736842105263	Prps1	0.846272811630065	Tmsb15l	0.410958904109589	Snx12	0	Armcx1	0.989304812834224	Cstf2	0.475524475524475	Maged2	0.0105263157894737	Atrx	0	Chic1	0.804878048780488	Pola1	1	Sh3bgrl	0.0337142857142857
Tmem164	0.658064516129032	Itm2a	0.125	Psmd10	0.765032377428307	Tmsb15b2	0.46875	Foxo4	0	Armcx5	1.05714285714286	Cenpi	0.531914893617021	Gnl3l	0.0255941499085923	Magt1	0	Tsx	1.25	Pdk3	0	Rps6ka6	0.00119331742243437
Alg13	1.07379612257661	Rps6ka6	0.701492537313433	Nxt2	0.880361173814898	Tmsb15b1	0.396551724137931	Il2rg	0	Gprasp1	1.06508875739645	Armcx1	0.320117474302496	Tsr2	0.00163132137030995	Atp7a	0	Rlim	0.563253012048193	Zfx	0	Armcx1	0.00161030595813205
Apex2	1.02261306532663	Cenpi	0.561643835616438	Acsl4	0.845864661654135	Fam199x	0.475	Med12	0	Bhlhb9	1.17808219178082	Gprasp1	0.495348837209302	Huwe1	0.0186721991701245	Lpar4	0.0104166666666667	Abcb7	1.6875	Apoo	0.0892857142857143	Armcx5	0
Pfkfb1	1.52631578947368	Armcx1	0.610526315789474	Alg13	0.96083385975995	Trap1a	0.567164179104478	Zmym3	0	Arxes2	0.744047619047619	Bhlhb9	0.409411764705882	Hsd17b10	0.0103734439834025	Itm2a	0.00716845878136201	2610029G23Rik	1.13475177304965	Maged1	0.32967032967033	Gprasp1	0.0676625659050967
Maged2	1.4822695035461	Armcx5	1.17647058823529	Apex2	1.16537467700258	Rnf128	0.4	Nono	0	Arxes1	1.54098360655738	Arxes2	0.420320855614973	Ribc1	0.010752688172043	2610002M06Rik	0	Atrx	1.07453416149068	Gspt2	0	Bhlhb9	0.0210970464135021
Gnl3l	1.13250714966635	Gprasp1	0.333333333333333	Maged2	0.913265306122449	Prps1	0.594405594405594	Ogt	0	Wbp5	0.819108280254777	Arxes1	0.477406679764244	Smc1a	0.032258064516129	Sh3bgrl	0.0029940119760479	Magt1	0.134146341463415	Zc4h2	0.352941176470588	Arxes2	0.00609446419502285
Tsr2	0.90453834115806	Bhlhb9	0.255102040816327	Gnl3l	0.786142571618921	Tsc22d3	0.0377358490566038	Ercc6l	0	Tmsb15l	0.728571428571429	Wbp5	0.402067183462532	Kdm5c	0.018957345971564	Rps6ka6	0.00934579439252336	Atp7a	0.5	Las1l	0.338709677419355	Arxes1	0.00529100529100529
Huwe1	1.04578313253012	Arxes2	0.302949061662198	Fgd1	1.03191489361702	Psmd10	0.615894039735099	Chic1	0	Tmsb15b2	0.636363636363636	Tmsb15l	0.286384976525822	Ubqln2	0.018018018018018	Cstf2	0	Lpar4	1.14285714285714	Ophn1	0	Wbp5	0.0358725761772853
Hsd17b10	1.10438024231128	Arxes1	0.173267326732673	Tsr2	1.05897177419355	Acsl4	0.438914027149321	Tsx	0	Fam199x	1.74418604651163	Tmsb15b2	0.250814332247557	2210013O21Rik	0	Cenpi	0	Itm2a	1.63414634146341	Yipf6	1.70588235294118	Tmsb15l	0.0578034682080925
Smc1a	1	Wbp5	0.346116970278044	Huwe1	0.969578017664377	Tmem164	0.579710144927536	Rlim	0	Trap1a	1.45810055865922	Tmsb15b1	0.353932584269663	Acot9	0.00632911392405063	Armcx1	0.00440528634361234	Brwd3	0.75	Stard8	0	Tmsb15b2	0.0668058455114822
Kdm5c	1.12413793103448	Tmsb15l	0.152542372881356	Hsd17b10	1.01092896174863	Alg13	0.532258064516129	5530601H04Rik	0	Prps1	0.95928226363009	Fam199x	0.425287356321839	Sms	0.0133333333333333	Armcx5	0	Hmgn5	0.384615384615385	Efnb1	0	Tmsb15b1	0.0491803278688525
Tspyl2	0.993150684931507	Tmsb15b2	0.0377358490566038	Smc1a	0.790123456790123	Apex2	0.34375	2610029G23Rik	0.00917431192660551	Psmd10	0.983935742971888	Trap1a	0.626959247648903	Mbtps2	0	Gprasp1	0.0113636363636364	Sh3bgrl	1.05607476635514	Pja1	0.0769230769230769	Fam199x	0.00363636363636364
Shroom2	1.05882352941176	Tmsb15b1	1.75	Kdm5c	1.03513513513514	Maged2	0.477272727272727	Atrx	0	Nxt2	2.06060606060606	Prps1	0.519572953736655	Eif1ax	0.00816522574447646	Bhlhb9	0.00404858299595142	Rps6ka6	1.5	Igbp1	0.416666666666667	Mum1l1	0.00184162062615101
Mageh1	0.777173913043478	Mum1l1	1	2210013O21Rik	0.732758620689655	Gnl3l	0.521091811414392	Magt1	0	Acsl4	0.915841584158416	Psmd10	0.408127208480565	Map3k15	0.0109090909090909	Arxes2	0.00173010380622837	Cstf2	1.375	Pdzd11	0.533333333333333	Trap1a	0.0357142857142857
2210013O21Rik	1.11290322580645	Trap1a	0.827476038338658	Sat1	0.759541984732824	Tsr2	0.383771929824561	Itm2a	0	Alg13	0.973821989528796	Acsl4	0.585585585585586	Pdha1	0.0113735783027122	Arxes1	0	Cenpi	0	Snx12	0.580645161290323	Rnf128	0.0657894736842105
Sat1	1.7609561752988	Prps1	0.454323995127893	Acot9	1.11086474501109	Huwe1	0.746753246753247	2610002M06Rik	0	Apex2	1.14	Alg13	0.495867768595041	Ctps2	0.0134228187919463	Wbp5	0.0082276311278711	Armcx1	1.56164383561644	Il2rg	0	Morc4	0.00641399416909621
Acot9	0.75	Psmd10	0.420537897310513	Sms	0.973384030418251	Hsd17b10	0.377551020408163	Hmgn5	0	Maged2	1.11206896551724	Apex2	0.343881856540084	Ap1s2	0	Tmsb15l	0.0135970333745365	Gprasp1	0.887640449438202	Med12	0	Prps1	0.0569007263922518
Sms	1.1970802919708	Nxt2	0.235714285714286	Mbtps2	0.714285714285714	Ribc1	0.366666666666667	Sh3bgrl	0.2	Gnl3l	0.921921921921922	Maged2	0.380165289256198	Zrsr2	0.0429530201342282	Tmsb15b2	0.0122511485451761	Bhlhb9	0.408602150537634	Zmym3	0.25	Tsc22d3	0.0344827586206897
Mbtps2	0.745562130177515	Acsl4	0.819047619047619	Eif1ax	1.03565891472868	Smc1a	0.802395209580838	Rps6ka6	0	Fgd1	0.755555555555556	Gnl3l	0.569348659003831	Siah1b	0	Tmsb15b1	0.0466321243523316	Arxes2	1.85555555555556	Nono	0.459183673469388	Psmd10	0.0818965517241379
Eif1ax	0.790922259777885	Alg13	0.673065386922616	Map3k15	0.93029490616622	Kdm5c	0.62037037037037	Cenpi	0	Tsr2	0.793402777777778	Fgd1	0.453125	Pir	0	Zcchc18	0	Arxes1	0.976744186046512	Ogt	0.54228855721393	Acsl4	0.0193756727664155
Map3k15	1.2398753894081	Apex2	0.803921568627451	Pdha1	0.928981032201147	Shroom2	0.241935483870968	Armcx4	0	Huwe1	0.907949790794979	Tsr2	0.534246575342466	Piga	0	Fam199x	0.00680272108843537	Wbp5	1.74203821656051	Cited1	0.14375	Tmem164	0.00121506682867558
Pdha1	1.08970233306516	Pfkfb1	0.67741935483871	Ctps2	0.844621513944223	Mageh1	0.242424242424242	Armcx1	0.04	Hsd17b10	0.987804878048781	Huwe1	0.58596837944664	Fancb	0	Mum1l1	0.00177619893428064	BC065397	1.96153846153846	Chic1	0	Alg13	0.182879377431907
Phka2	1.15	Maged2	0.810126582278481	Zrsr2	1.02405498281787	Ubqln2	0.313725490196078	Gprasp1	0	Ribc1	0.924528301886793	Hsd17b10	0.492281303602058	Rab9	0.0153846153846154	Trap1a	0	Tmsb15l	9.80645161290323	Xist	1.96666666666667	Amot	0.00873362445414847
Ctps2	0.747126436781609	Gnl3l	0.977040816326531	Siah1b	0.992260061919505	2210013O21Rik	0.473684210526316	Bhlhb9	0	Smc1a	0.774468085106383	Ribc1	0.425	Prps2	0.046875	Prps1	0.0031413612565445	Tmsb15b1	0.657894736842105	B230206F22Rik	0	Apex2	0.00597014925373134
Ap1s2	0.547079856972586	Tsr2	0.618032786885246	Pir	0.858227848101266	Sat1	0.359375	Arxes2	0	Kdm5c	0.874285714285714	Smc1a	0.4608	Hccs	0.0163934426229508	Tsc22d3	0.0162866449511401	Trap1a	0.886666666666667	Rlim	0.0969976905311778	Maged2	0.00458553791887125
Zrsr2	0.963327370304114	Phf8	0.755102040816326	Fancb	1.48657718120805	Acot9	0.348148148148148	Arxes1	0	Tspyl2	0.403846153846154	Kdm5c	0.448512585812357			Psmd10	0.0139103554868624	Rnf128	0.315789473684211	2610029G23Rik	0.473958333333333	Gnl3l	0.000943396226415094
Siah1b	0.84982332155477	Huwe1	0.576059850374065	Ofd1	1.06692913385827	Sms	0.200819672131148	Wbp5	0.04	Shroom2	1.27272727272727	Shroom2	0.412903225806452			Nxt2	0.005	Morc4	1.1123595505618	Atrx	0.330935251798561	Tsr2	0.125836680053548
Pir	1.07258064516129	Hsd17b10	0.691022964509395	Rab9	0.869731800766284	Eif1ax	0.785607196401799	BC065397	0	Ubqln2	0.294117647058823	Mageh1	0.364516129032258			Acsl4	0.0144404332129964	Rbm41	0.538461538461538	Magt1	0.144230769230769	Huwe1	0.0551053484602917
Piga	0.913461538461538	Ribc1	0.884615384615385	Prps2	0.733433734939759	Map3k15	0.392523364485981	Tmsb15l	0	2210013O21Rik	0.614583333333333	Ubqln2	0.350877192982456			Tmem164	0	Prps1	0.985546522131888	Atp7a	0.233333333333333	Hsd17b10	0.0446428571428571
Fancb	0.947674418604651	Smc1a	0.509578544061303	Hccs	0.820472440944882	Pdha1	0.533447684391081	Tmsb15b2	0	Sat1	0.971751412429378	2210013O21Rik	0.525925925925926			Alg13	0.00289855072463768	Tsc22d3	0.08	Itm2a	0.533557046979866	Smc1a	0.0213776722090261
Ofd1	0.841216216216216	Kdm5c	0.583815028901734			Rbbp7	0.52	Tmsb15b1	0	Acot9	0.606060606060606	Sat1	0.594059405940594			Amot	0.00394477317554241	Psmd10	1.02803738317757	2610002M06Rik	0.128205128205128	Kdm5c	0.120582120582121
Rab9	1.07591623036649	2900056M20Rik	0.21875			Ctps2	0.897260273972603	Mum1l1	0	Sms	0.811428571428571	Acot9	0.578703703703704			Apex2	0.0203193033381713	Atg4a	0.222222222222222	Brwd3	0.384615384615385	Tspyl2	0
Egfl6	2	Tspyl2	0.714285714285714			Zrsr2	0.808656036446469	Trap1a	0	Mbtps2	0.742857142857143	Sms	0.726063829787234			Maged2	0.0109606705351386	Nxt2	1.6	Hmgn5	0.133333333333333	Mageh1	0.0931458699472759
Prps2	0.707142857142857	Shroom2	0.51948051948052			Siah1b	0.70391061452514	Rnf128	0	Eif1ax	0.91304347826087	Mbtps2	0.435779816513761			Gnl3l	0.00570884871550904	Acsl4	3.13513513513514	Sh3bgrl	0.0578778135048232	Ubqln2	0.00904977375565611
Hccs	1.04448742746615	Mageh1	0.536231884057971			Pir	0.887096774193548	Rbm41	0	Map3k15	0.754940711462451	Eif1ax	0.481361829025845			Tsr2	0.00566037735849057	Tmem164	0.092436974789916	Rps6ka6	0.0125786163522013	2210013O21Rik	0.00986842105263158
Mid1	0.387096774193548	Ubqln2	0.382978723404255			Fancb	0.737704918032787	Prps1	0.00201207243460765	Pdha1	0.769980506822612	Map3k15	0.573696145124717			Phf8	0.015748031496063	Alg13	0.646616541353383	Chm	0	Sat1	0.0362116991643454
		2210013O21Rik	0.397590361445783			Ofd1	0.796875	Psmd10	0	Ctps2	0.784037558685446	Pdha1	0.600792253521127			Huwe1	0	Apex2	0.633333333333333	Armcx4	0	Acot9	0.0295983086680761
		Sat1	1.03448275862069			Rab9	0.901234567901235	Nxt2	0	Ap1s2	1.30769230769231	Ctps2	0.587209302325581			Hsd17b10	0.00118906064209275	Pfkfb1	0.785714285714286	Armcx1	0.0649350649350649	Sms	0.0483870967741935
		Acot9	0.296296296296296			Prps2	0.746938775510204	Acsl4	0	Zrsr2	0.746835443037975	Zrsr2	0.443097643097643			Ribc1	0	Maged2	0.491428571428571	Gprasp1	0.276995305164319	Mbtps2	0.12962962962963
		Sms	0.836065573770492			Hccs	0.690058479532164	Tmem164	0	Siah1b	0.846808510638298	Siah1b	0.608695652173913			Smc1a	0.00769230769230769	Gnl3l	0.554794520547945	Bhlhb9	0.282608695652174	Eif1ax	0.0161137440758294
		Mbtps2	0.430232558139535			Mid1	0.101063829787234	Alg13	0.00816326530612245	Pir	1.1556420233463	Pir	0.552795031055901			Kdm5c	0.0637254901960784	Tsr2	1.79020979020979	Arxes2	0.614285714285714	Map3k15	0.0775193798449613
		Eif1ax	0.447937131630648					Apex2	0	Piga	0.559322033898305	Piga	0.568965517241379			Tspyl2	0	Phf8	2.71428571428571	Arxes1	0.0681818181818182	Pdha1	0.0541190619362598
		Map3k15	0.875862068965517					Pfkfb1	0	Fancb	0.583333333333333	Fancb	0.384039900249377			Shroom2	0.00413223140495868	Huwe1	0.595744680851064	Wbp5	0.111027190332326	Phka2	0
		Pdha1	0.65914585012087					Maged2	0	Ofd1	1.79591836734694	Ofd1	0.618518518518518			Mageh1	0	Hsd17b10	0.410714285714286	Tmsb15l	0.428571428571429	Rbbp7	0.0169491525423729
		Ctps2	0.284313725490196					Gnl3l	0.00840336134453781	Rab9	0.839160839160839	Rab9	0.578767123287671			Ubqln2	0	Ribc1	0.829268292682927	Tmsb15b2	0.234042553191489	Syap1	0.0687022900763359
		Ap1s2	0.161016949152542					Fgd1	0	Prps2	1.14893617021277	Tceanc	0.509615384615385			2210013O21Rik	0.0234741784037559	Smc1a	0.58974358974359	Tmsb15b1	0.837209302325581	Ctps2	0.0294117647058824
		Zrsr2	0.841787439613527					Tsr2	0.012987012987013	Msl3	0.532258064516129	Prps2	0.682577565632458			Sat1	0	Kdm5c	0.231404958677686	Zcchc18	0.0746268656716418	Zrsr2	0.0692704495210022
		Siah1b	0.477351916376307					Huwe1	0	Hccs	0.836923076923077	Hccs	0.75054704595186			Acot9	0	Shroom2	0.785714285714286	Fam199x	0	Siah1b	0.0384615384615385
		Pir	0.566775244299674					Hsd17b10	0							Sms	0.0107719928186715	Mageh1	0.583333333333333	Mum1l1	0.0595238095238095	Fancb	0
		Piga	0.441605839416058					Smc1a	0							Mbtps2	0	2210013O21Rik	0.932203389830508	Trap1a	0.469387755102041	Ofd1	0.0107913669064748
		Fancb	0.503937007874016					Kdm5c	0.0277777777777778							Eif1ax	0.00454742312689476	Sat1	0.746268656716418	Morc4	0.482142857142857	Rab9	0.00561797752808989
		Ofd1	0.482014388489209					2900056M20Rik	0							Sh3kbp1	0	Acot9	0.666666666666667	Rbm41	0	Prps2	0.013869625520111
		Rab9	0.577319587628866					Shroom2	0							Map3k15	0.0132275132275132	Sms	1.47887323943662	Prps1	0.788778877887789	Msl3	0.0943134535367545
		Tceanc	0.337837837837838					Mageh1	0							Pdha1	0.00880444856348471	Eif1ax	0.998158379373849	Psmd10	0.171052631578947	Hccs	0.0335731414868106
		Prps2	0.201183431952663					Ubqln2	0							Phka2	0	Mtap7d2	0.0126582278481013	Atg4a	0.105263157894737
		Hccs	0.520833333333333					2210013O21Rik	0							Ctps2	0	Map3k15	0.1875	Nxt2	0
		Mid1	0.052757793764988					Sat1	0							Ap1s2	0.00578034682080925	Pdha1	0.335483870967742	Acsl4	0.0596026490066225
								Acot9	0							Zrsr2	0.00569259962049336	Txlng	1.44444444444444	Tmem164	0.0190114068441065
								Sms	0							Siah1b	0.00188323917137476	Syap1	0.586206896551724	Ammecr1	0
								Mbtps2	0							Pir	0.0449438202247191	Ctps2	3.29268292682927	Pak3	0.0217391304347826
								Yy2	0							Fancb	0.0025	Zrsr2	1.43983402489627	Alg13	1.34210526315789
								Eif1ax	0.0037037037037037							Ofd1	0	Siah1b	0.860655737704918	Amot	0.65
								Mtap7d2	0							Rab9	0	Pir	0.355140186915888	Apex2	0.0169491525423729
								Map3k15	0							Prps2	0.00805008944543828	Fancb	0.0958904109589041	Pfkfb1	0.269230769230769
								Pdha1	0							Msl3	0	Ofd1	0.855614973262032	Tro	0
								Scml2	0							Hccs	0.0202020202020202	Rab9	1.20689655172414	Maged2	0.0417112299465241
								Txlng	0							Mid1	0.00911577028258888	Egfl6	0	Gnl3l	0.037037037037037
								Syap1	0									Prps2	1.75609756097561	Tsr2	0.152173913043478
								Ctps2	0									Msl3	3.89473684210526	Phf8	1.075
								Ap1s2	0									Hccs	0.31924882629108	Huwe1	0.1796875
								Zrsr2	0.00564971751412429											Hsd17b10	0.0879120879120879
								Siah1b	0											Smc1a	0.36
								Pir	0											Iqsec2	0
								Fancb	0											Kdm5c	0.872727272727273
								Ofd1	0.0487804878048781											2900056M20Rik	0.301587301587302
								Rab9	0											Tspyl2	0
								Tceanc	0											Shroom2	0.037037037037037
								Prps2	0											Usp51	0
								Msl3	0											Mageh1	0.118421052631579
								Hccs	0											Ubqln2	0
								Mid1	0											2210013O21Rik	0.152173913043478
																				Sat1	0.113702623906706
																				Acot9	0.00578034682080925
																				Sms	0
																				Mbtps2	0.156862745098039
																				Yy2	0.111111111111111
																				Rps6ka3	0
																				Eif1ax	0.192771084337349
																				Mtap7d2	0.215686274509804
																				Map3k15	0.441860465116279
																				Pdha1	0.15625
																				Rbbp7	0.0909090909090909
																				Syap1	0.142857142857143
																				Ctps2	0.0982658959537572
																				Ap1s2	0
																				Zrsr2	0.65597667638484
																				Car5b	0.4
																				Pir	1
																				Gpm6b	0.0642857142857143
																				Ofd1	2.40540540540541
																				Rab9	0.140625
																				Tceanc	0.0454545454545455
																				Prps2	0.305555555555556
																				Msl3	0.108024691358025
																				Hccs	0.161904761904762
																				Mid1	0.0483383685800604
